# Supplementary material
Source: PubMed Central journal article supplement (PMC5760353)
Supplement: NIHMS926960-supplement-Supplementary_Figures___Tables.pdf [file NIHMS926960-supplement-Supplementary_Figures___Tables.pdf]

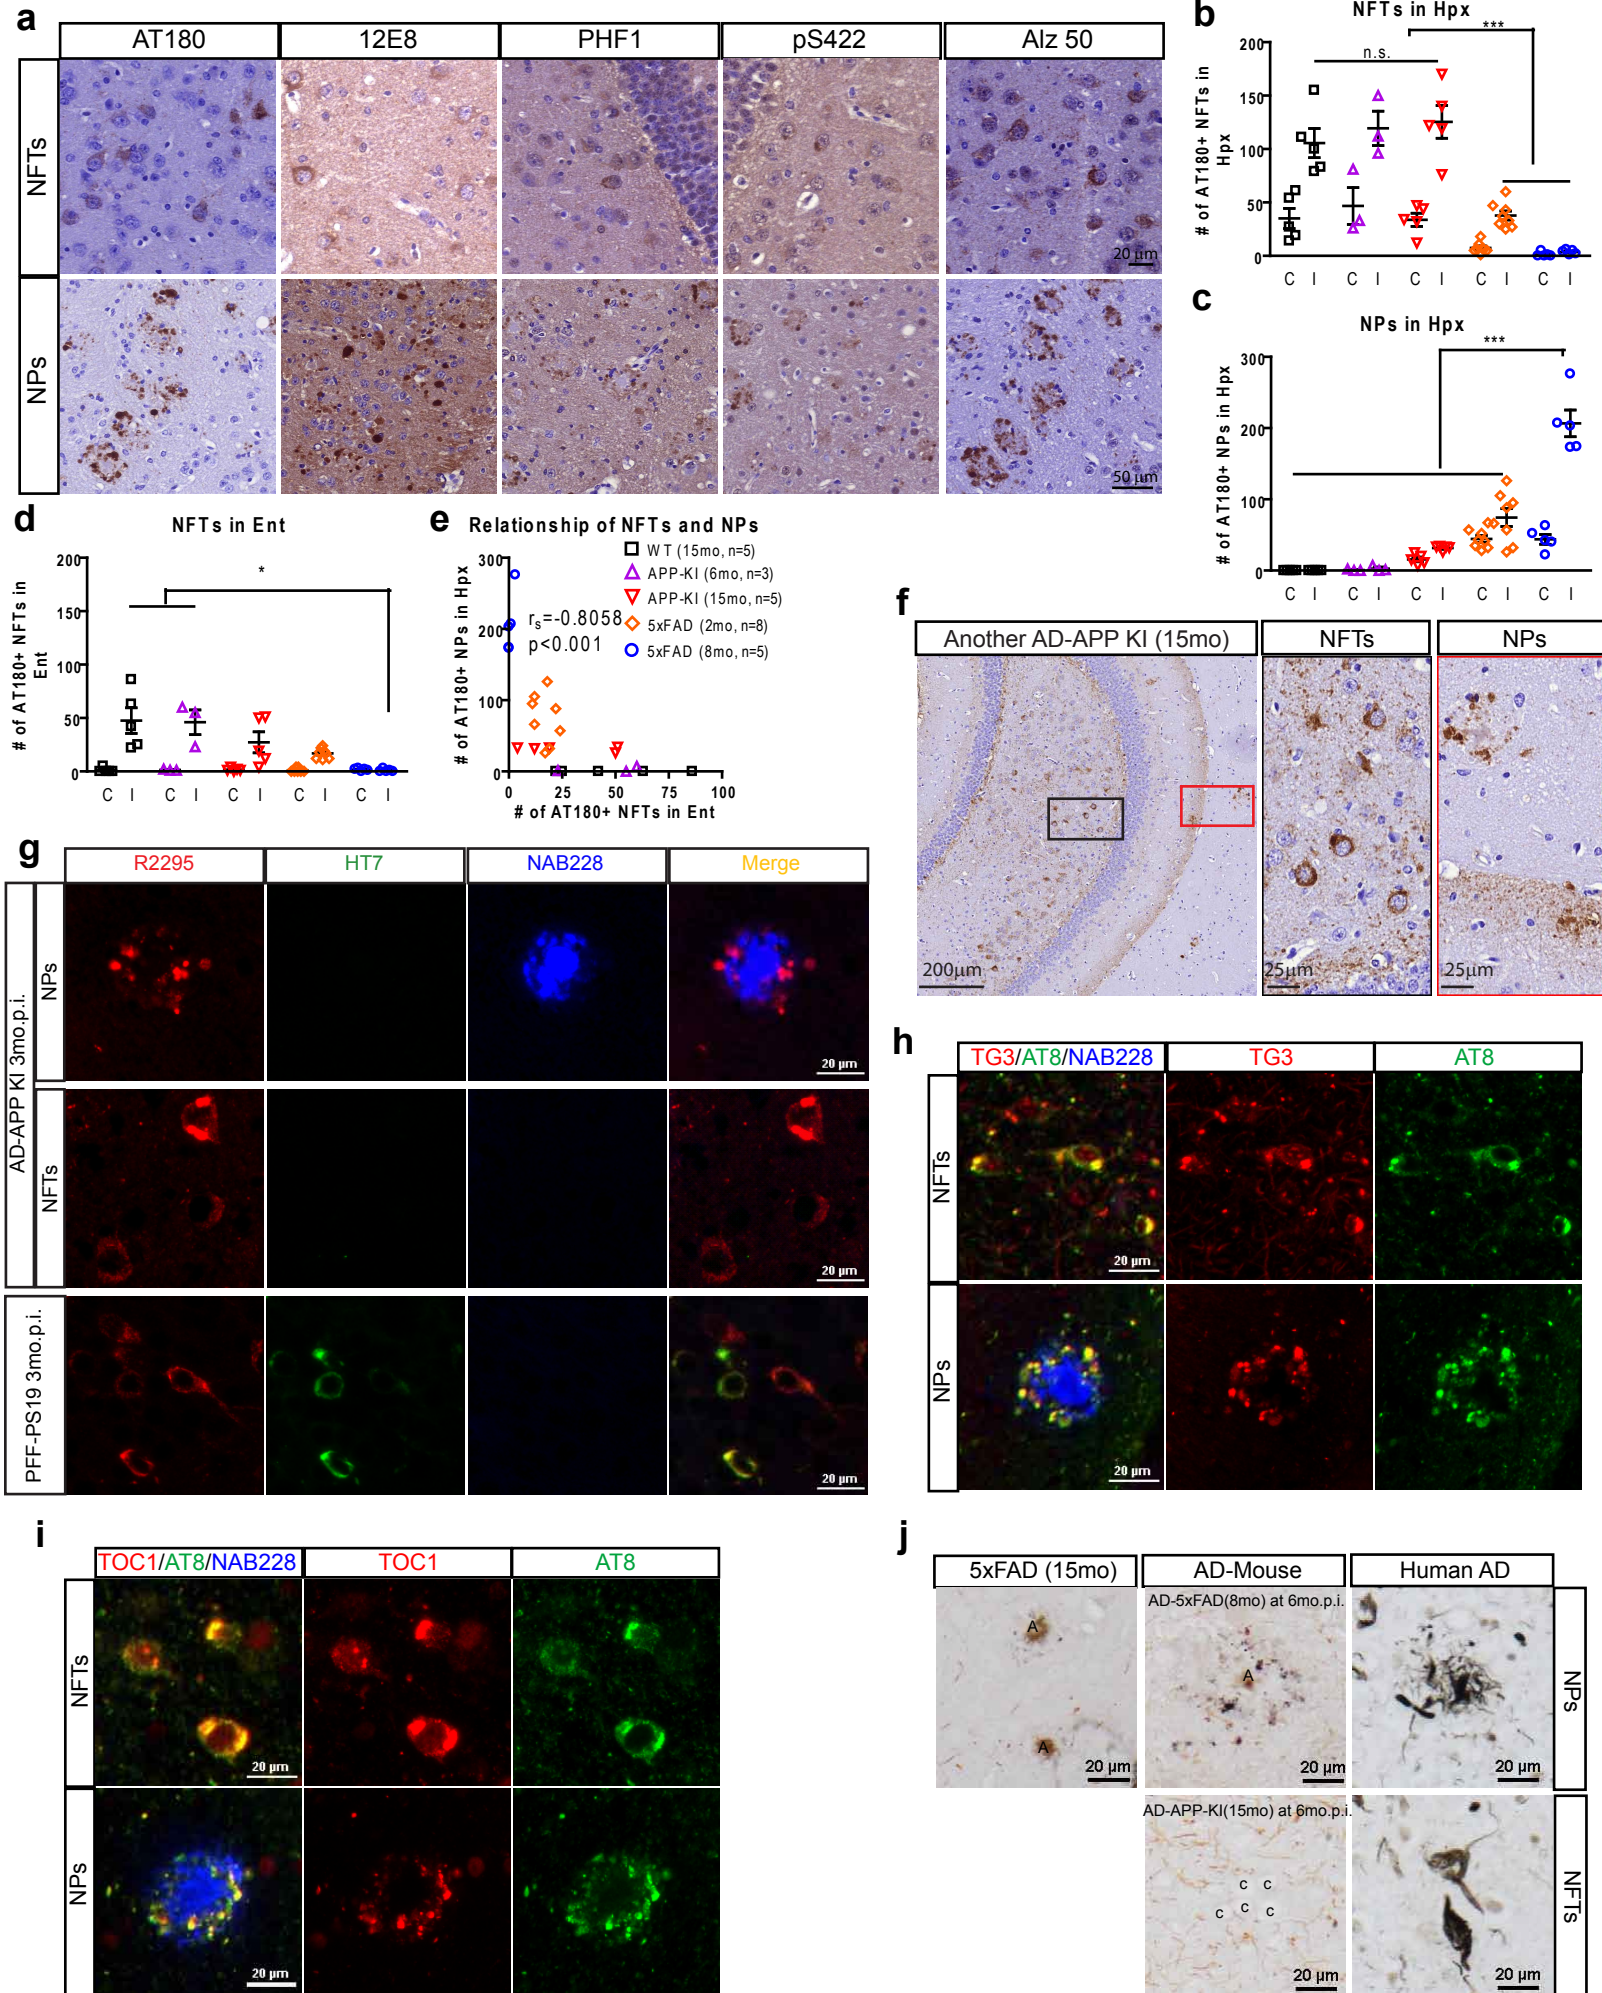

### Supplementary Figure 1: Characterization of NPs and NFTs induced by AD-tau.

**a**, Representative immunohistochemistry staining of the induced NFTs and NPs at 3 mo.p.i. of AD-tau detected with anti-tau antibodies with different epitopes: AT180 (pThr231), 12E8 (pSer262/pSer356), PHF1 (pSer396/pSer404), pS422 (pSer422), Alz50 (misfolded conformation of AD-tau). Quantification of AT180-positive NFTs (**b**) and NPs (**c**) in hippocampus; and NFTs (**d**) in entorhinal cortex for both ipsilateral (I) and contralateral (C) sides of the WT, APP-KI and 5xFAD mice injected with AD-tau and analyzed at 3 mo.p.i.. Color codes are in **e**. One-way ANOVA with Tukey's multiple comparison tests were performed,  $**P < 0.01$ ,  $***P < 0.001$ . **e**, inverse correlation between AT180+ NPs in the ipsilateral hippocampus and AT180+ NFTs in the ipsilateral entorhinal cortex (Spearman correlation  $r_s = -0.806$ ,  $p < 0.001$ ). **f**, The induction of AD-like NFT and NP tau pathologies are not case-specific. 15-month old APP KI mice injected with AD-tau purified from a second AD brain also showed AD-like AT8+ NFTs and NPs at 3 mo.p.i.. Right panels are the higher magnification of the areas within the rectangles on the left. The black frame shows magnified views of the AD-like NFTs and the red frame shows magnified views of NPs. **g**, Triple-labeling with rabbit anti-mouse tau-selective antibody R2295, human tau-selective MAb HT7 and A $\beta$  antibody NAB228 in AD-APP KI (15mo). Tau PFF-injected PS19 mice overexpressing human tau with a P301S *MAPT* mutation (PFF-PS19) at 3mo.p.i. is used as a positive control for HT7 antibody. Triple labeling of NFTs and NPs with AT8, A $\beta$  plaques with NAB228 and **h**, conformation-dependent anti-tau antibody TG3 or **i**, oligomeric anti-tau antibody TOC1 in APP-KI (15 mo) at 3 mo.p.i. **j**, Gallyas silver staining of the NFTs and NPs. Right column, the positive silver staining of both NPs and NFTs in human AD brain sections. Middle columns, the silver staining on AD-5xFAD (8mo) or AD-APP-KI (15mo) at 6 mo.p.i. with AT8-positive NPs or AD-like NFTs, respectively. Only NP tau showed appreciable silver staining in the AD-tau-injected 5xFAD mice, while no Gallyas positive AD-like NFT-tau can be detected up to 6 mo.p.i. Left column, similarly aged non-injected 5xFAD mice (15mo) showed minimal silver staining of neurites around A $\beta$  plaques. Black signal indicates the real silver staining. Letter A denotes A $\beta$  plaque core and letter C denotes neuronal cell body.

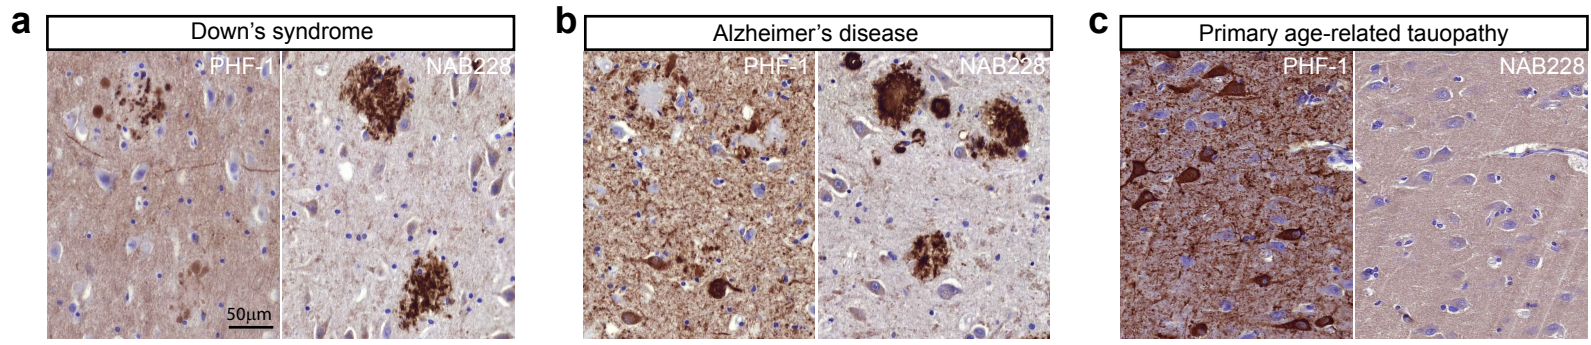

**Supplementary Figure 2: The relationship between NPs and NFTs in human disease.**

Representative immunostaining with MAbs PHF-1 and NAB228 on pairs of adjacent brain sections from **a**, 4 cases of young Down's syndrome patients with A $\beta$  plaque pathology and NPs, **b**, 9 cases of AD with A $\beta$  plaques and both NPs and NFTs, **c**, 7 cases of primary age-related tauopathy patients with NFTs.

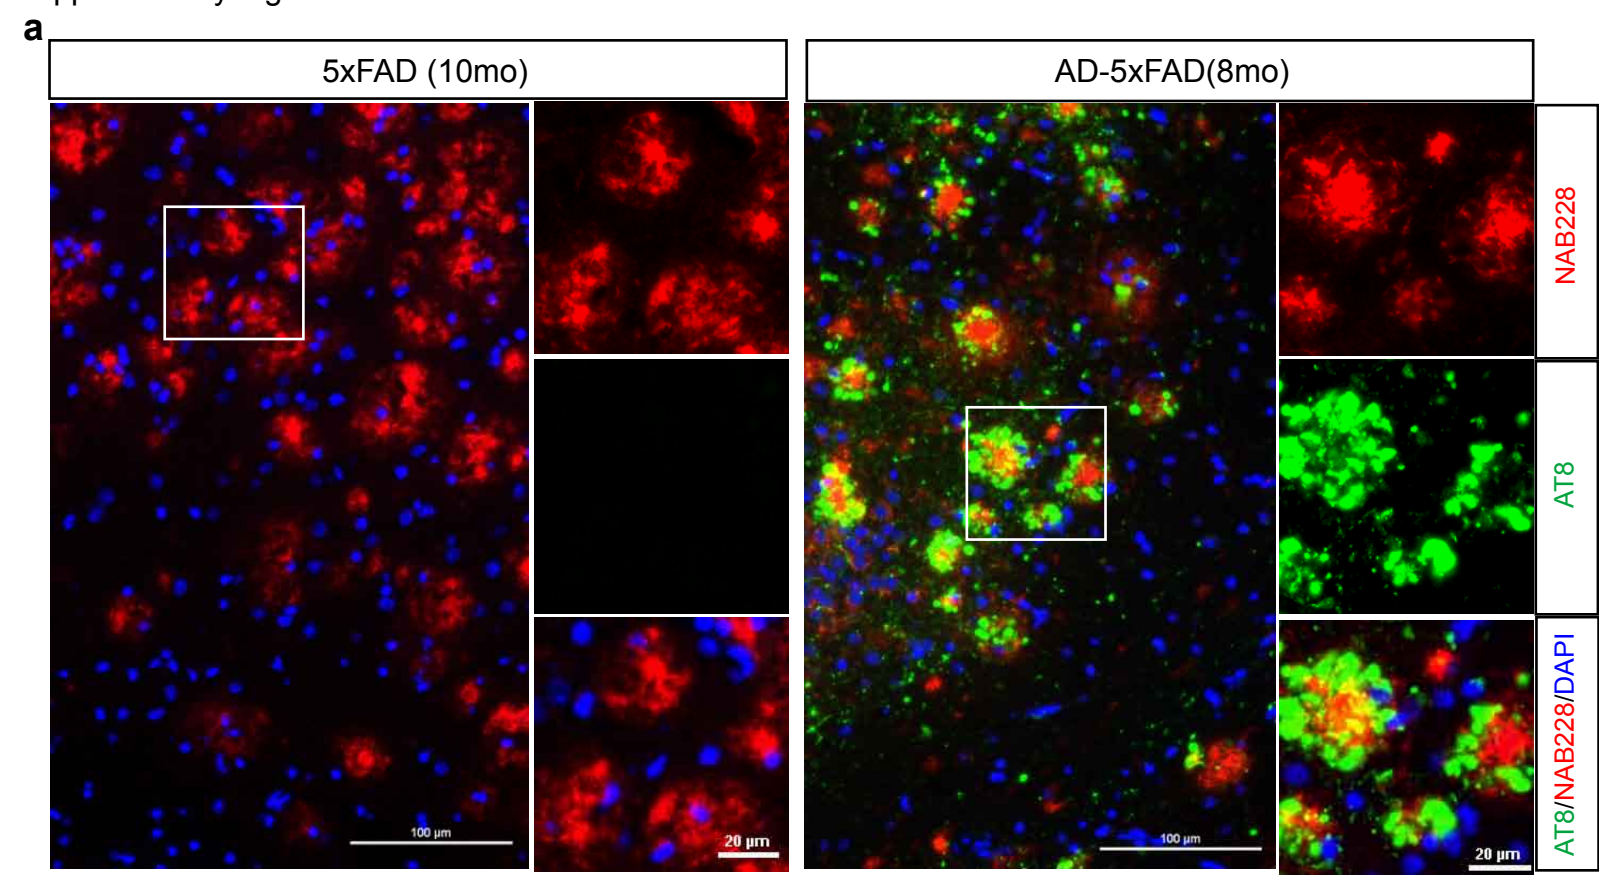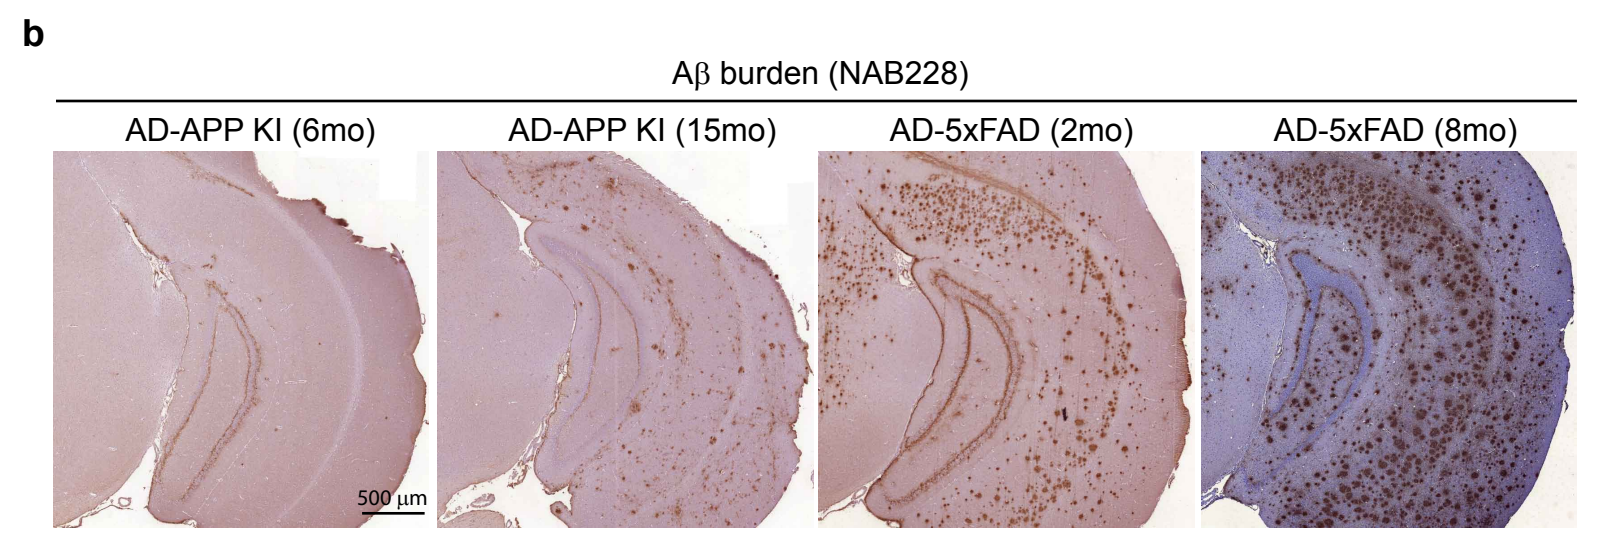

**Supplementary Figure 3: The A $\beta$  plaque burden positively correlates with the induction of NPs.**

**a**, Double labeling with AT8 and NAB228 antibodies in 5xFAD (8mo) mice without or with AD-tau injection at 3 mo.p.i.. Areas within the square frames are shown in the panels on the right at higher magnifications. **b**, Representative immunostaining with NAB228 antibody showing the A $\beta$  burden in APP-KI and 5xFAD mice at different ages injected with the same dose of AD-tau at 3 mo.p.i.. AD-APP-KI (6mo, n=3), AD-APP-KI (15mo, n=5), AD-5xFAD (2mo, n=8) and AD-5xFAD (8mo, n=5) were quantified and the quantifications of the A $\beta$  burden are shown in Figure 1q.

Supplementary Fig. 4

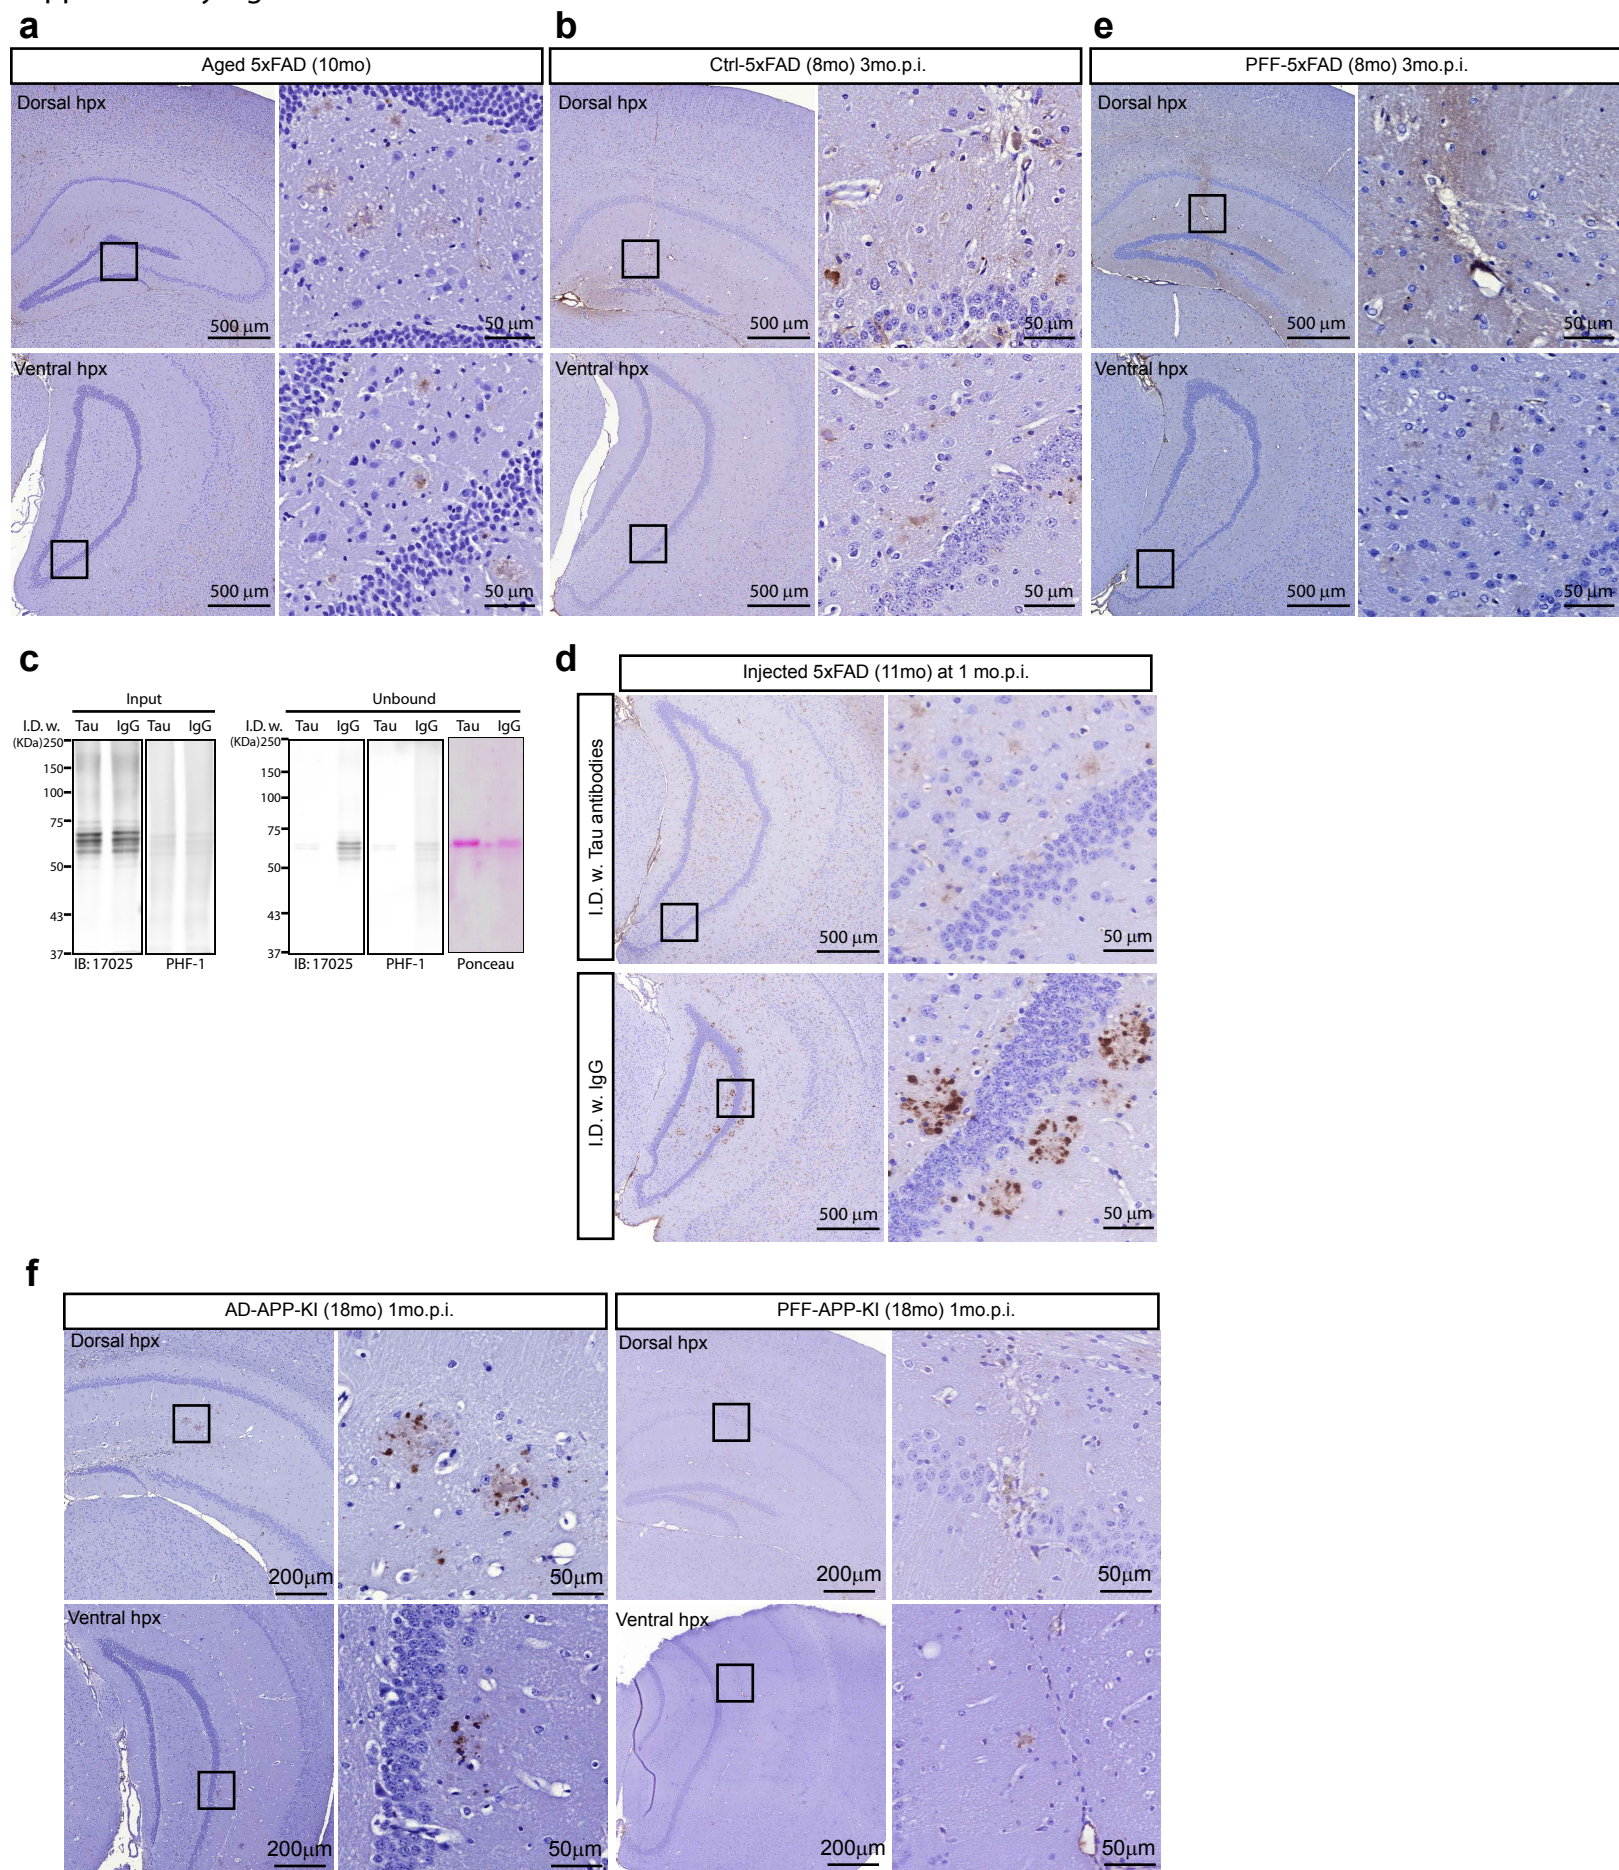

**Supplementary Figure 4: AD-tau, but not synthetic tau fibrils, induces NPs in old 5xFAD mice.**

Representative AT8 immunostaining of ipsilateral dorsal (top) and ventral (bottom) hippocampal regions from **a**, 5xFAD (10mo) mice; **b**, 5xFAD (8mo) mice injected with control brain lysate at 3 mo.p.i. and **e**, 5xFAD (8mo) mice injected with 4.5  $\mu$ g tau PFFs assembled from recombinant tau proteins at 3 mo.p.i.. None showed convincing AT8+ tau pathologies at the indicated time points. **c**, AD brain lysates containing the same amount of AD-tau proteins were respectively incubated with anti-tau antibodies or IgG control, and the immunoblot shows that AD-tau was largely immuno-depleted (I.D.) from the AD brain lysates, while the main protein contaminants detected by Ponceau red were still present. **d**, Representative AT8 immunostaining of ipsilateral ventral hippocampus for 5xFAD (11mo) mice injected with AD brain lysates immuno-depleted with (top) or without (bottom) anti-tau antibodies at 1 mo.p.i.. **f**, Representative AT8 immunostaining of ipsilateral dorsal and ventral hippocampus in APP-KI (18mo) mice injected with 2  $\mu$ g AD-tau or 4.5  $\mu$ g tau PFFs assembled from recombinant tau proteins at 1 mo.p.i.. The images on right panels in **a**, **b**, **d**, **e**, **f** are higher magnifications of the areas within black squares on the left. Each group contains 3 mouse.



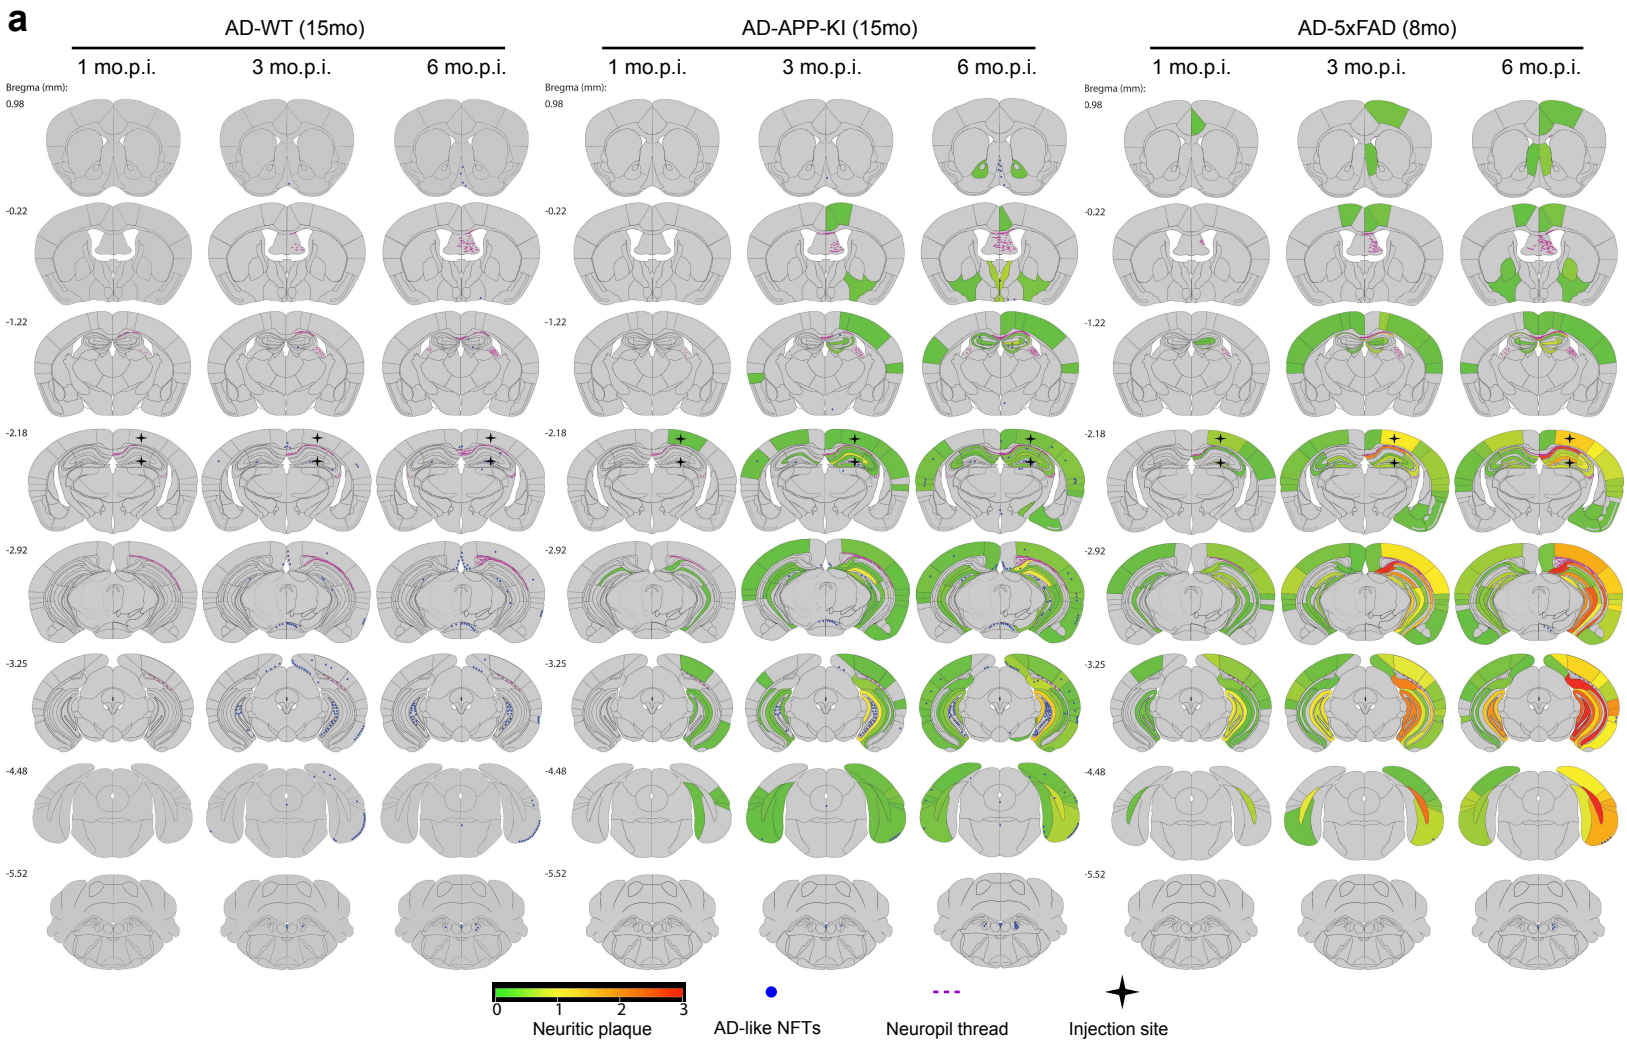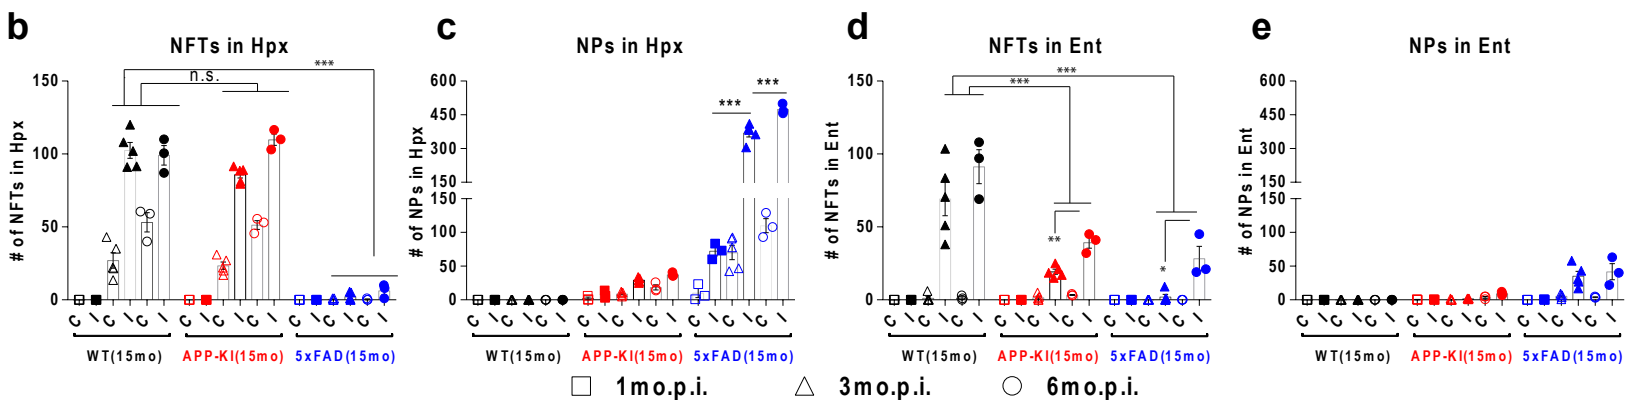

**Supplementary Figure 5: Time course of dynamic changes of tau in AD-like NFTs and NPs in vivo.**

**a**, Heatmaps representing the semi-quantitative analysis of AD-like NFTs and NPs based on AT8 immunostaining in AD-tau injected WT (15mo), APP-KI (15mo) and 5xFAD (8mo) mice at 1-, 3- and 6 mo.p.i.. Coronal planes at Bregma (mm) 0.98, -0.22, -1.22, -2.18, -2.92, -3.25, -4.48 and -5.52 are shown. Heat colors represent tau positive NPs (0: no pathology, gray; 3: maximum pathology, red), blue dots represent tau positive AD-like NFTs, purple lines represent tau positive NTs in the corpus callosum and fimbria. Black stars indicate the injection sites. Average scores from each cohort mice are presented. The number of NFTs (**b**) and NPs (**c**) in hippocampus (Hpx), and NFTs (**d**) and NPs (**e**) in entorhinal cortex (ENT) were quantified temporally in both ipsilateral (I) and contralateral (C) sides in each cohort shown in **a**. Each group contains 3-5 mice, each indicated as a dot in the graphs **b-e**. Data are presented with the mean  $\pm$  s.e.m., and one-way ANOVAs with Tukey's tests, \*\* $P \leq 0.01$ , \*\*\* $P \leq 0.001$ .

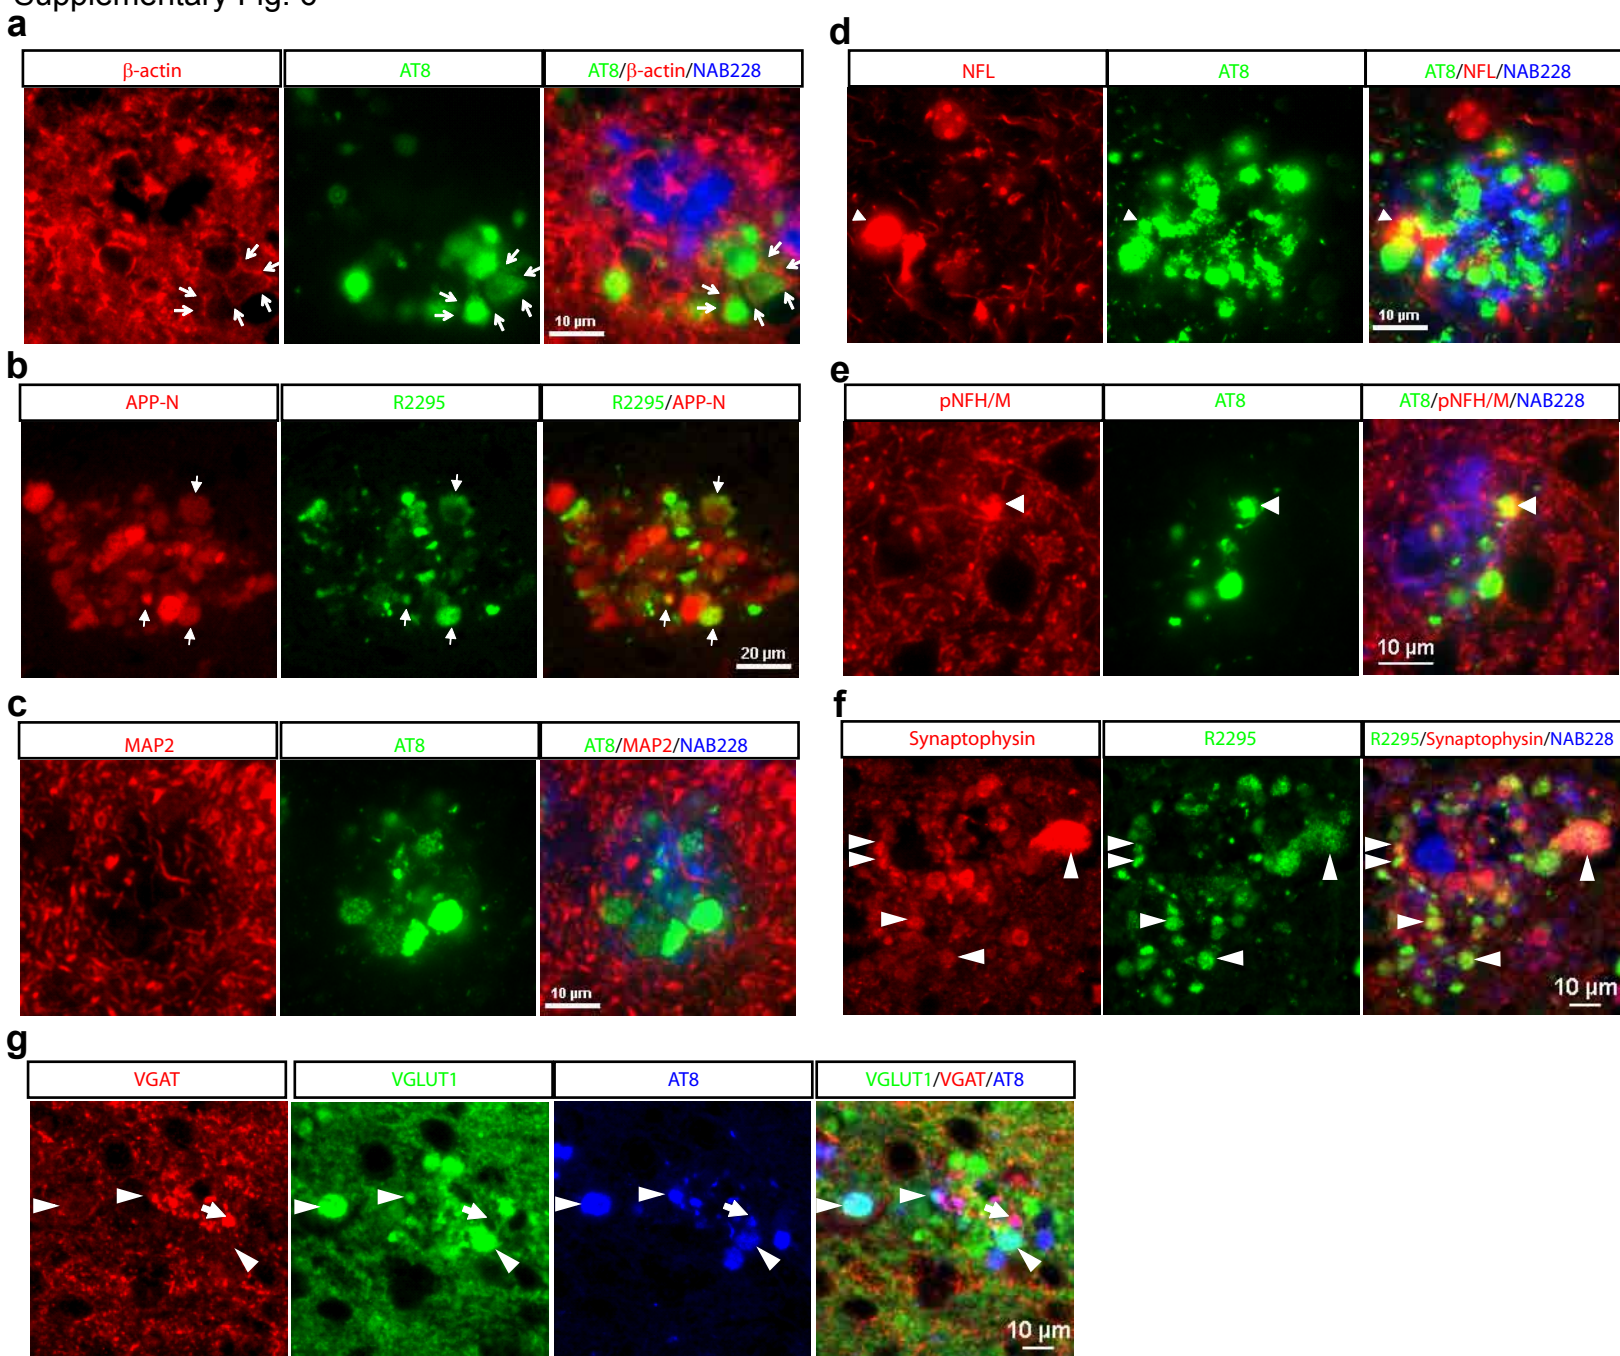

### Supplementary Figure 6: Subcellular localization of NP tau pathologies.

**a**, Triple-labeling of NPs with antibodies AT8, NAB228 and  $\beta$ -actin, showing tau positive NPs are surrounded by  $\beta$ -actin enriched membrane boundaries. Arrows indicate the  $\beta$ -actin boundaries. **b**, double-labeling NPs with tau antibody R2295 and APP antibody 22C11, a dystrophic neurite marker which shows that NP tau is localized in dystrophic neurites surrounding A $\beta$  plaques. **c**, Triple-labeling NPs with AT8, NAB228 and dendritic marker MAP2, showing NPs were not localized in dendrites. **d-e**, triple-labeling NPs with AT8, NAB228 and axonal marker phospho-independent neurofilament light chain antibody NFL (**d**), or phospho-dependent heavy and middle neurofilament chains MAb TA51 (**e**), showing NPs are localized in axons. **f**, Triple-labeling NPs with R2295, NAB228 and presynaptic marker synaptophysin antibody, which demonstrate that NPs are localized in presynaptic dystrophic neurites. Arrows and arrow heads in **b**, and **d** to **f**, indicate the aforementioned co-localizations. **g**, Triple-labeling NPs with AT8, excitatory synaptic vesicle marker VGLUT1 antibody and inhibitory synaptic vesicle marker VGAT antibody, showing that NPs are mostly localized in dystrophic axons enriched with excitatory synaptic vesicles, but to a lesser extent also in dystrophic axons with inhibitory synaptic vesicles. The brain slices were from AD-APP KI (15mo) or AD-5xFAD (8mo) mice at 3 mo.p.i.. **a, c-g**, scale bar, 10  $\mu$ m; **b**, scale bar, 10  $\mu$ m.

Supplementary Fig. 7

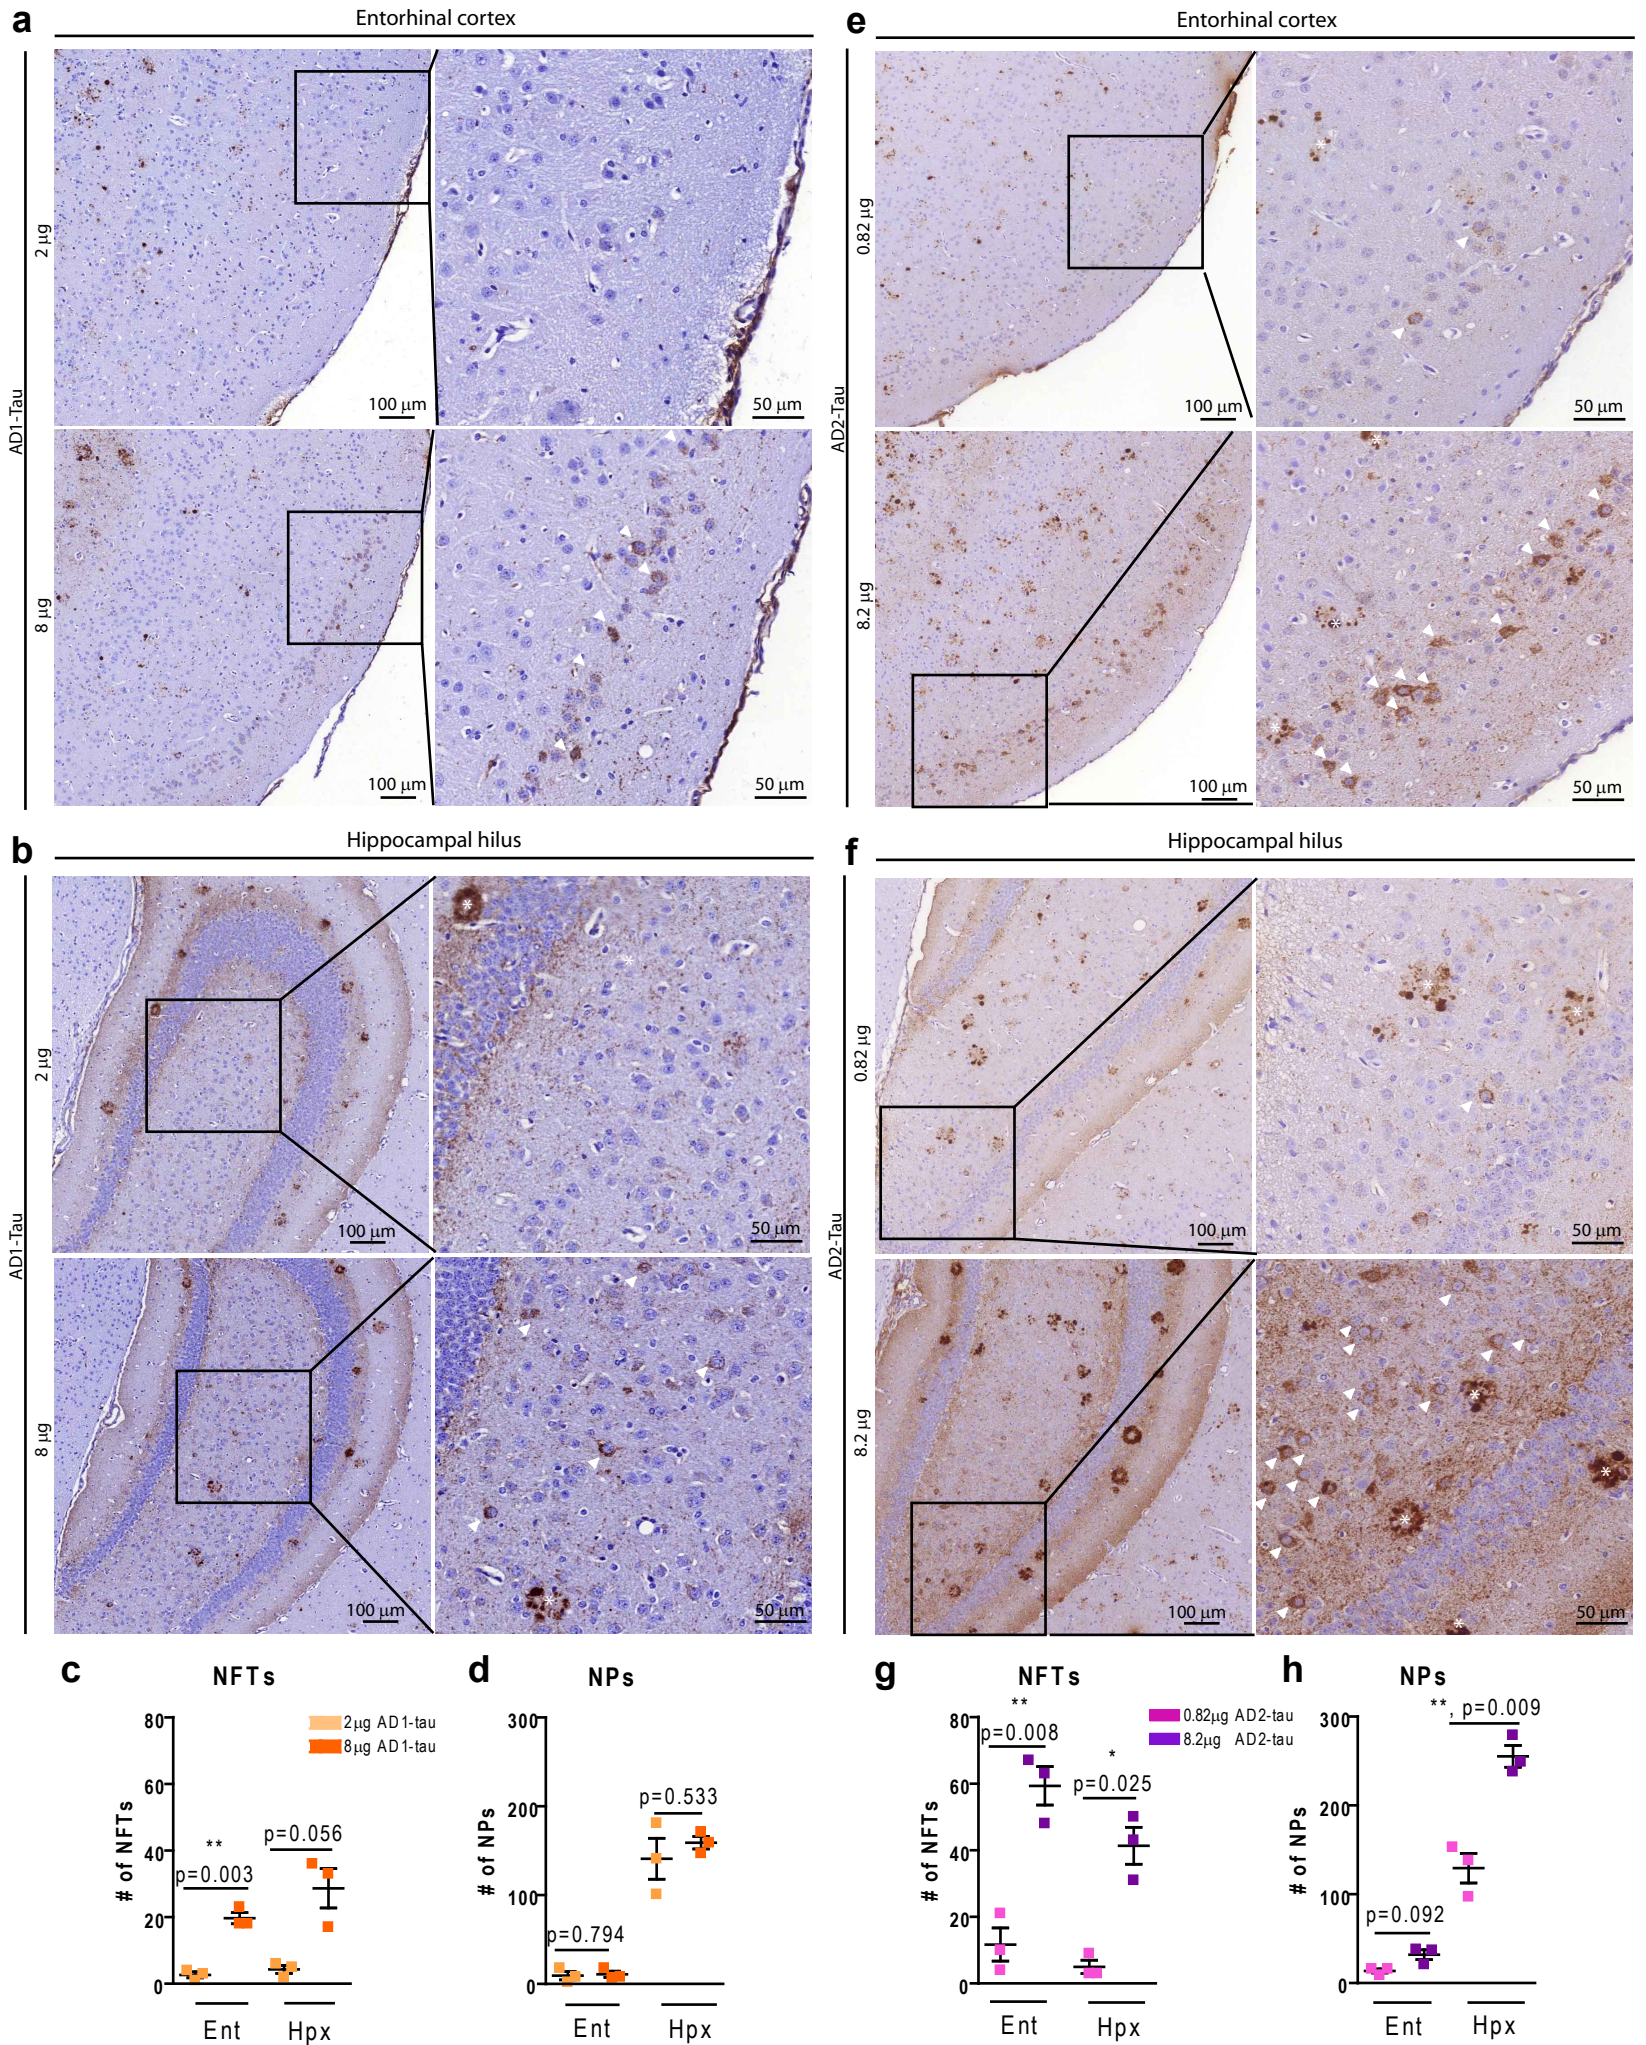

**Supplementary Figure 7: High, but not low, doses of AD-tau induce significant NFTs in 5xFAD mice with abundant A $\beta$  plaques.**

5xFAD (4mo) with abundant A $\beta$  plaques were injected with low or high dose AD-tau extracted from two different AD brains. **a-d**, AD-tau extracted from AD1 brain were injected into 5xFAD mouse brains at low or high (2 or 8  $\mu$ g per mouse) doses. Representative AT8 immunostaining of ipsilateral entorhinal cortex (**a**) and ventral hippocampal hilus regions (**b**) from low doses (2  $\mu$ g per mouse) or high doses (8  $\mu$ g per mouse) of a AD1-tau injected 5xFAD (4mo) mice at 3 mo.p.i.. Quantification of NFTs (**c**) and NPs (**d**) in both entorhinal cortex and hippocampus on the ipsilateral side of the mice shown in **a, b**. **e-h**, AD-tau extracted from AD2 brain were injected into 5xFAD mouse brains at low or high (0.82 or 8.2  $\mu$ g per mouse) dose. Representative AT8 immunostaining of ipsilateral entorhinal cortex (**e**) and ventral hippocampal hilus regions (**f**) from low doses (0.82  $\mu$ g per mouse) or high doses (8.2  $\mu$ g per mouse) of AD2-tau injected 5xFAD (4mo) mice at 3 mo.p.i.. Quantification of NFTs (**g**) and NPs (**h**) in both entorhinal cortex and hippocampus on the ipsilateral side of the mice shown in **e, f**. The black frames at the left indicate the higher magnification images on the right. White arrowheads indicate the NFTs, and the asterisks indicate NPs. Note that the NFTs are almost formed in the high dose AD-tau injected 5xFAD mice while the low dose AD-tau injected 5xFAD mice almost only show NPs. Three mice per group were quantified and two-tailed t-tests were performed, with \*,  $p \leq 0.05$ ; \*\*,  $p \leq 0.01$ . AD-tau extracted from the AD1 case is somewhat less potent than the extracts from the AD2 case, which was derived from an old Down's Syndrome patient.

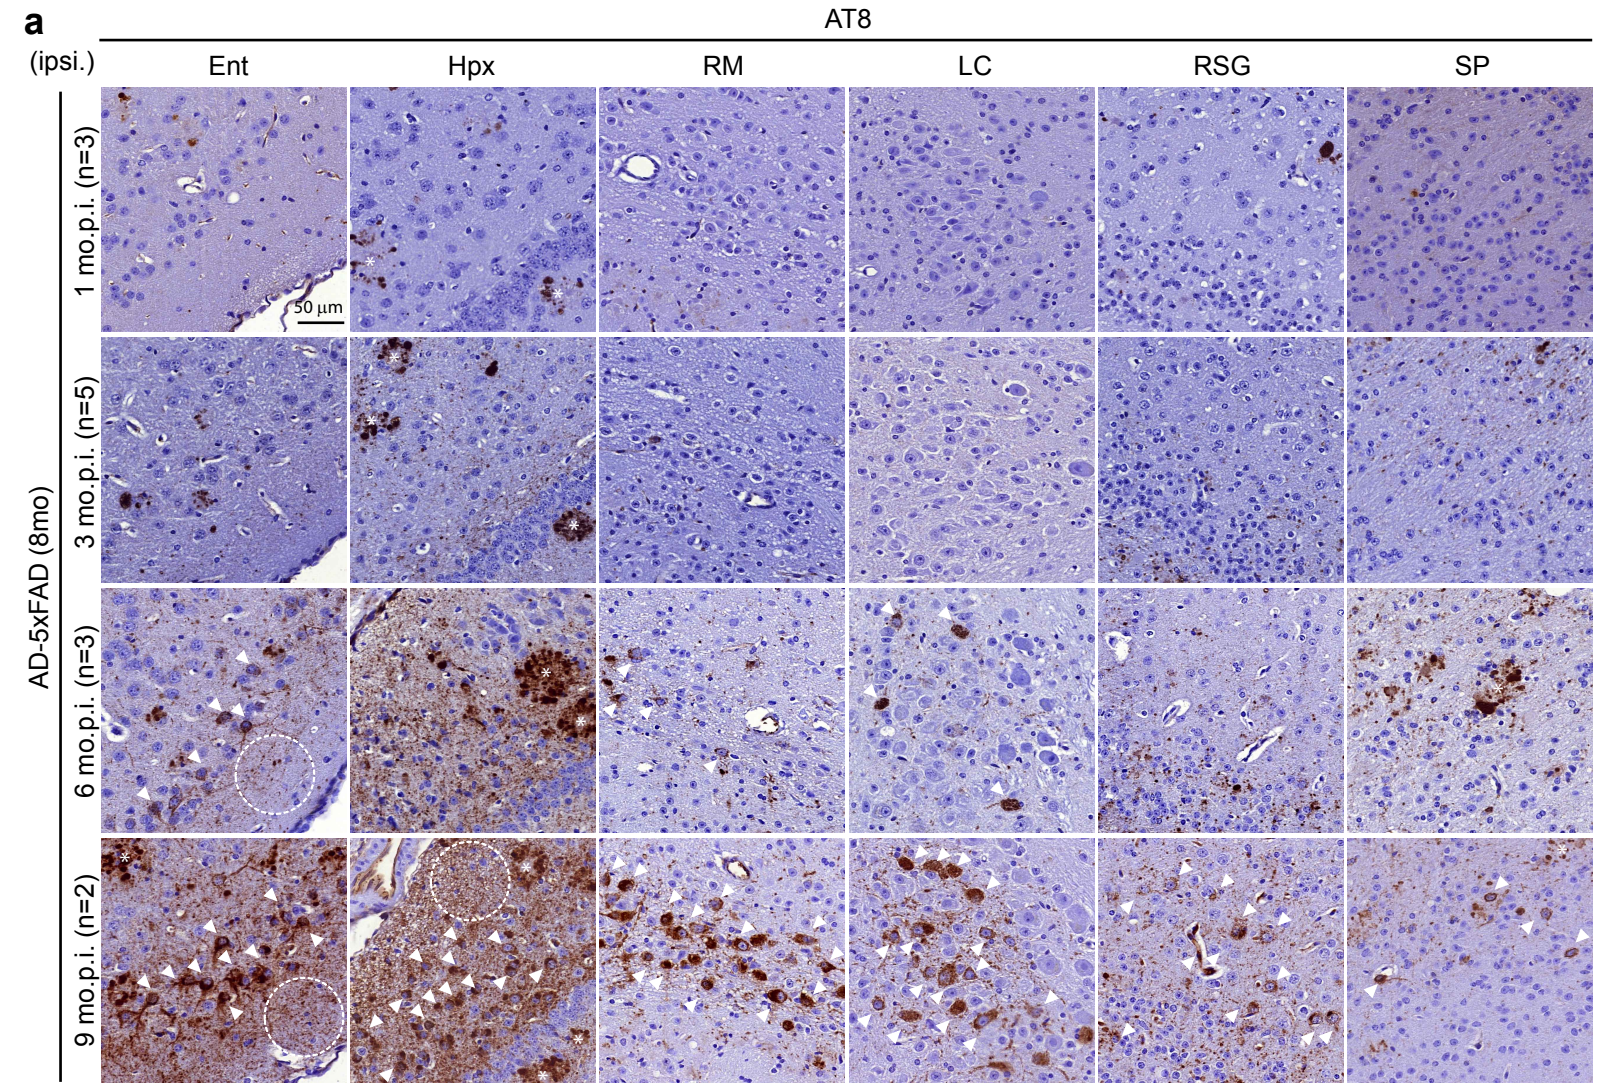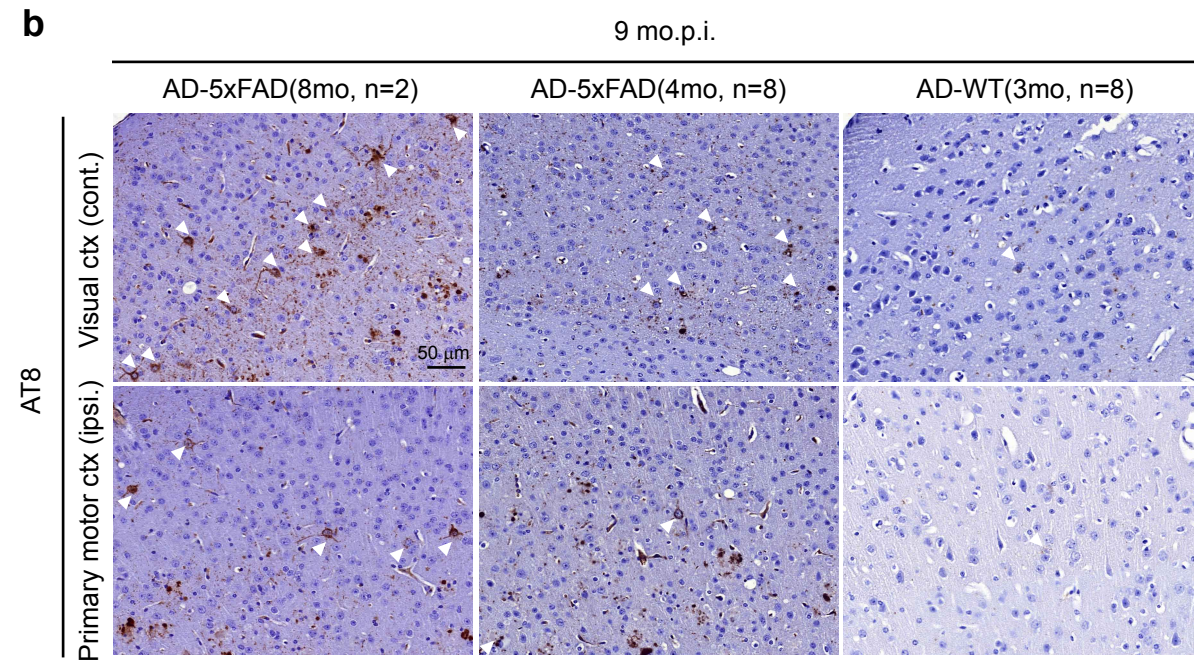

**Supplementary Figure 8: AD-tau injected old 5xFAD mice with a high density of NPs developed abundant NFTs at later time points post-injection.**

**a**, Representative images of tau pathologies revealed by MAb AT8 in the ipsilateral sides of AD-5xFAD (8mo) mice from 1 to 9 months after AD-tau injections. NFTs that were relatively absent before 3 mo.p.i. first appeared in entorhinal cortex at 6 mo.p.i. and spread to different brain regions at 9 mo.p.i.. **b**, AT8-labeled NFTs induced in AD-5xFAD (8mo) mice at 9 mo.p.i. spread to the ipsilateral primary motor cortex and contralateral visual cortex, where minimal NFTs were present in WT mice injected with the same amount of AD-tau after the same inoculation period. White arrowheads indicate the NFTs, dashed white circles indicate NTs, and the asterisks indicate NPs. Ent, entorhinal cortex; Hpx, hippocampus; RM, retromammillary nucleus; LC, locus coeruleus; RSG, retrosplenial granular cortex; SP, septal nucleus; ctx, cortex. 3 to 8 mice as indicated were analyzed for each time point, except only two 5xFAD (8mo) survived to 9 mo.p.i..



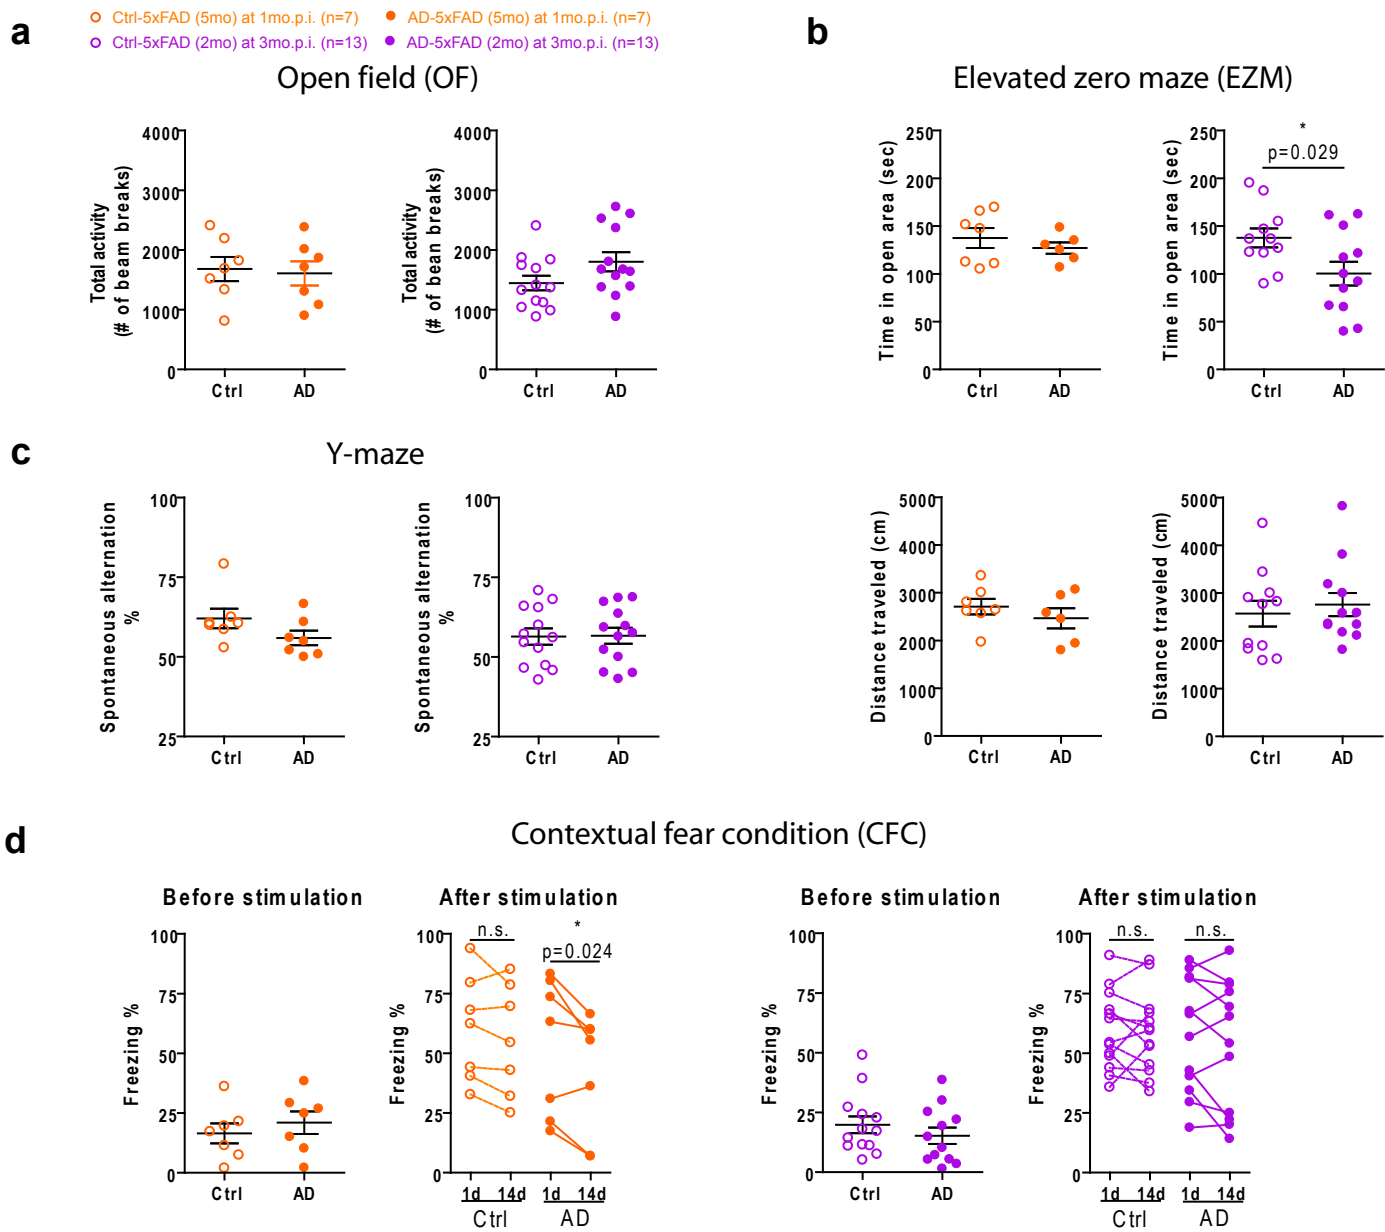

**Supplementary Figure 9: Additional behavior tests conducted in mice with NPs alone, or with both NPs and NFTs**

AD-5xFAD (5mo) mice after 1 mo.p.i. exclusively developed NPs while AD-5xFAD (2mo) mice after 3 mo.p.i. contained both NFTs and NPs. Age-matched uninjected littermate 5xFAD mice were used as controls. **a**, Open field testing shows no locomotor deficit in all the mice. **b**, Elevated zero maze results reveal AD-5xFAD (2mo) mice at 3 mo.p.i. spent less time in the open area than the control mice, whereas AD-5xFAD (5mo) at 1 mo.p.i. did not show any difference from age-matched control mice, suggesting that the AD-5xFAD (2mo) mice but not AD-5xFAD (5mo) mice showed anxiety-related behavior. **c**, Y-maze showing that mice with either NPs or both of NFTs and NPs had normal short-term memory as revealed by spontaneous alternation. Two-tailed t-tests were used in **a-c**, with \*,  $p \leq 0.05$ . **d**, Contextual fear conditioning testing shows that the basal freezing level before footshock stimulation was normal in both AD-5xFAD (5mo) mice at 1mo.p.i. and AD-5xFAD (2mo) mice at 3 mo.p.i. Statistical analysis was performed by a two-tailed t-test. After the footshock stimulation, AD-5xFAD (2mo) mice at 3 mo.p.i. showed similar learning trends from 1 to 14 days post-stimulation compared to control mice. However, AD-5xFAD (5mo) mice at 1 mo.p.i. showed decreased freezing levels from 1 to 14 days, while no such changes were observed in age-matched control 5xFAD mice. Statistical analysis was conducted by a two-way ANOVA with repeated measures. AD-5xFAD (5mo): time ( $p=0.005$ ,  $F=12.11$ ,  $DF=1$ ), AD ( $p=0.441$ ,  $F=0.634$ ,  $DF=1$ ), interaction ( $p=0.188$ ,  $F=1.949$ ,  $DF=1$ ), followed by two-tailed paired t-test. Each group contains 7-13 mice and each animal is indicated by a dot in the graphs.

Supplementary Fig.10

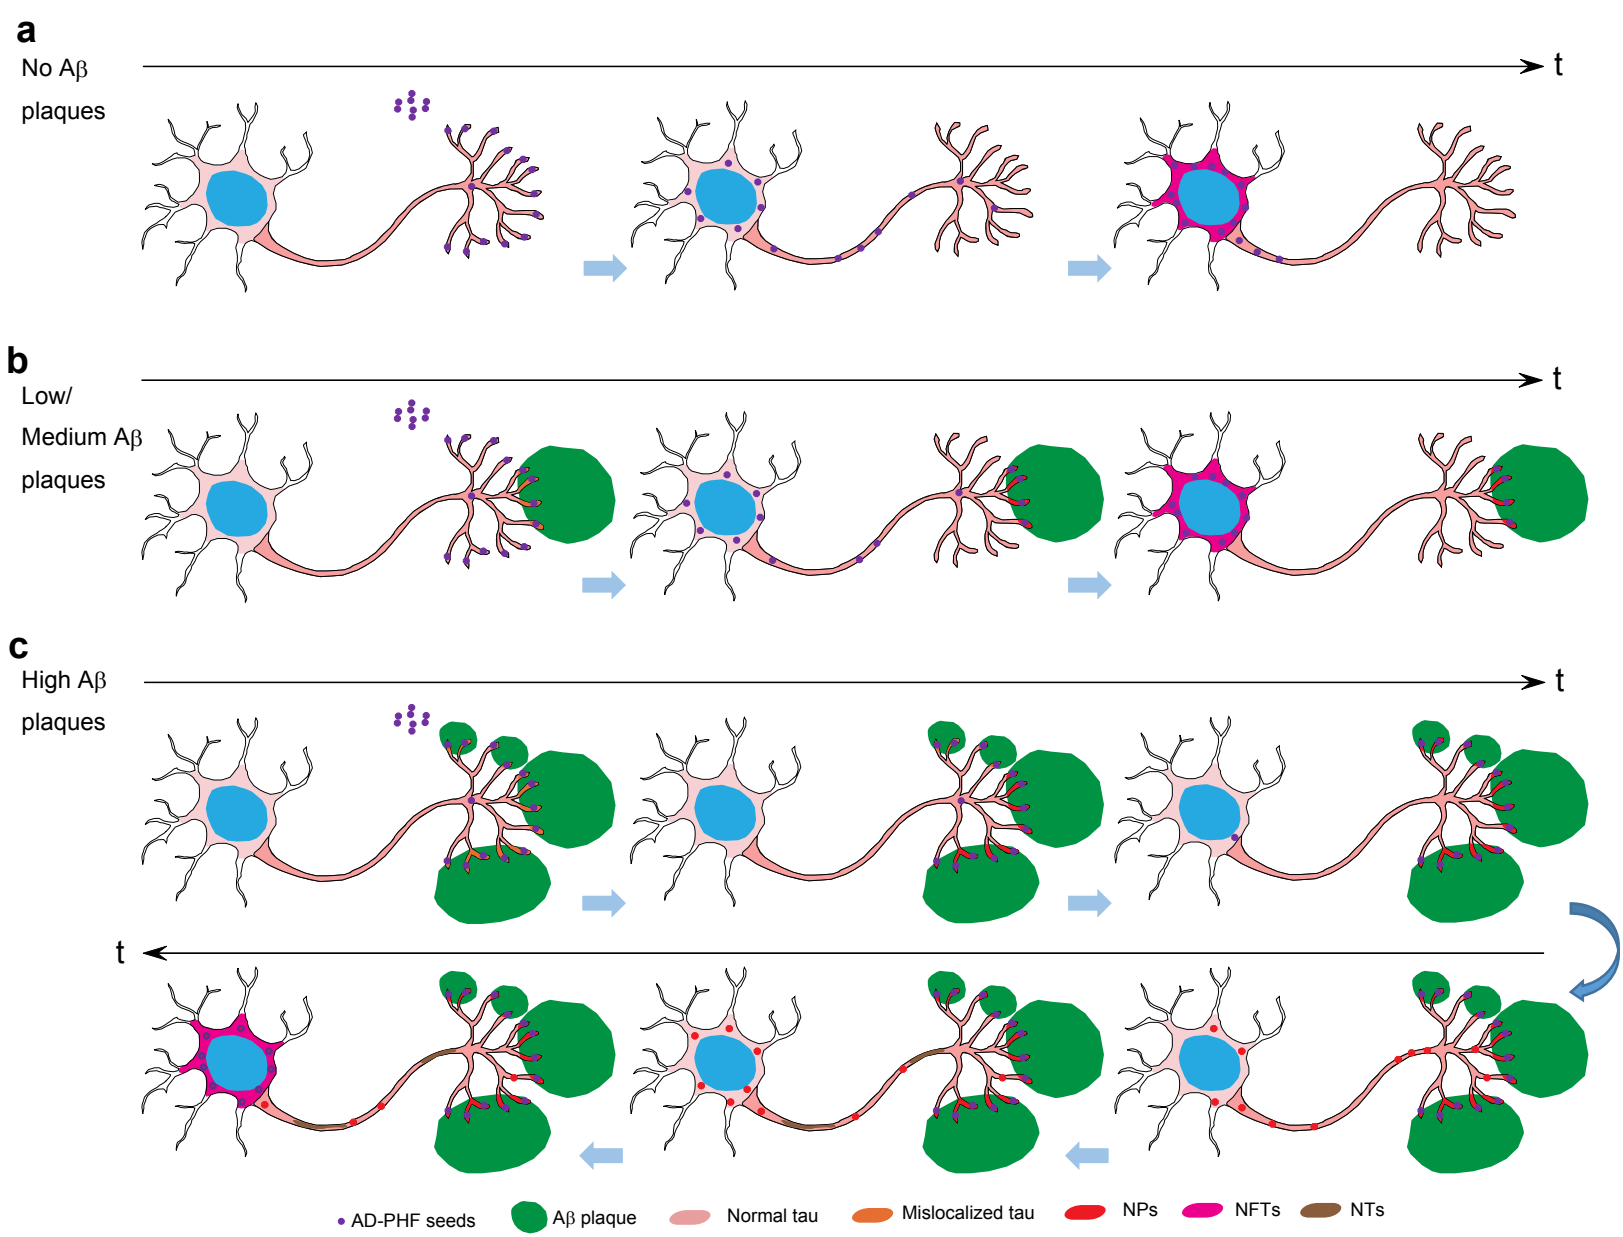

**Supplementary Figure 10: Multi-step mechanism underlying A $\beta$  plaque enhancement of tau seeded pathogenesis.**

Schematic diagrams summarizing a hypothesized mechanism of seeded tau pathogenesis in the absence or presence of A $\beta$  plaques. **a**, In the presence of pathological tau seeds, but in the absence of A $\beta$  plaques, endogenous mouse tau proteins may be slowly recruited into perikaryal deposits in vulnerable neurons to form NFTs. **b**, In the presence of a low/medium A $\beta$  plaque burden, mislocalized soluble endogenous tau accumulates in limited dystrophic neurites surrounding few A $\beta$  plaques, and therefore provide an accessible source of substrate for tau aggregation. Once pathological tau seeds enter those limited dystrophic neurites they seed the misfolding and aggregation of the accumulated tau, forming NPs. In addition, the remaining “unutilized” pathological tau seeds could likely be transported into neuronal somas to form NFTs, albeit at a slower rate than NP formation. **c**, In the presence of abundant A $\beta$  plaques, numerous dystrophic neurites with accumulated soluble tau are present. When pathological tau seed concentration is low, the internalized seeds are inferred to be consumed during seeding of NPs, leaving insufficient seeds to be transported to the soma to form NFTs. However, as the NP tau aggregates mature, small fragments of these aggregates could possibly break off and function as secondary pathological seeds through retrograde transport back into the parent neuronal somas, thereby seeding NT and NFT formation. Alternatively, they might also be released extracellularly and taken up by nearby dystrophic neurites around A $\beta$  plaques to form new NPs in a relative short period of time and initiate formation of NFTs later in new cycles of pathological tau amplification, thereby leading to the progressive spread of NFTs in regions with A $\beta$  plaques, and eventually throughout the AD brain.

Supplementary Fig. 11

Fig. 2b\_1mo.p.i.

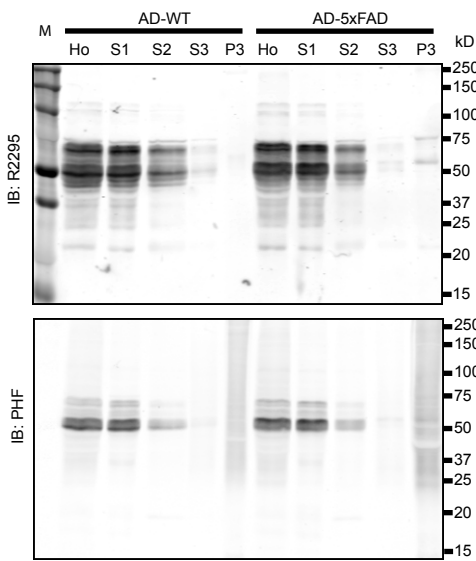

Fig. 2c\_3mo.p.i.

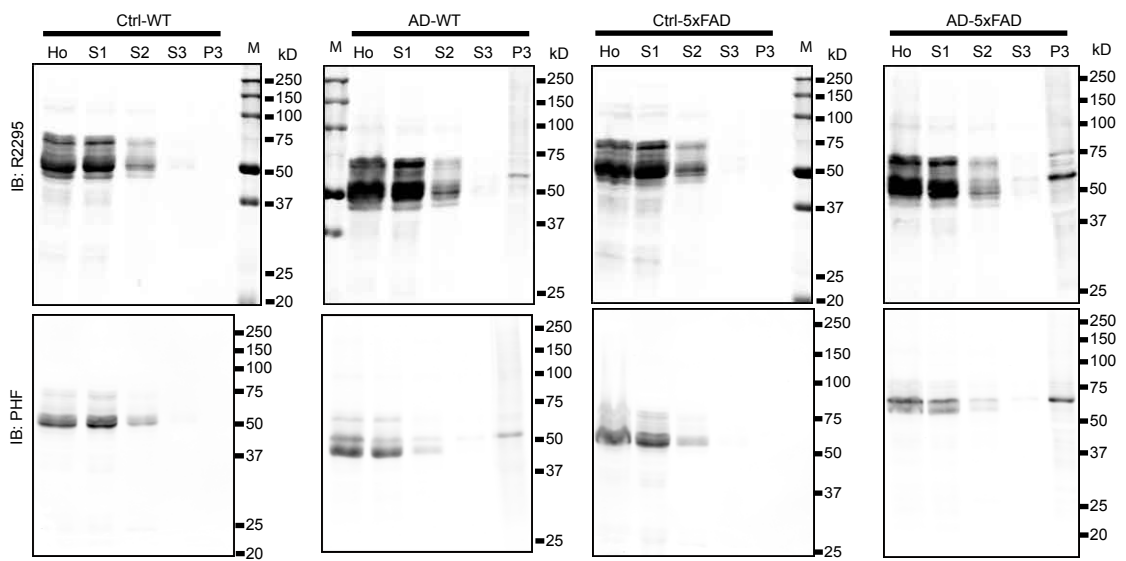

Fig. 3f

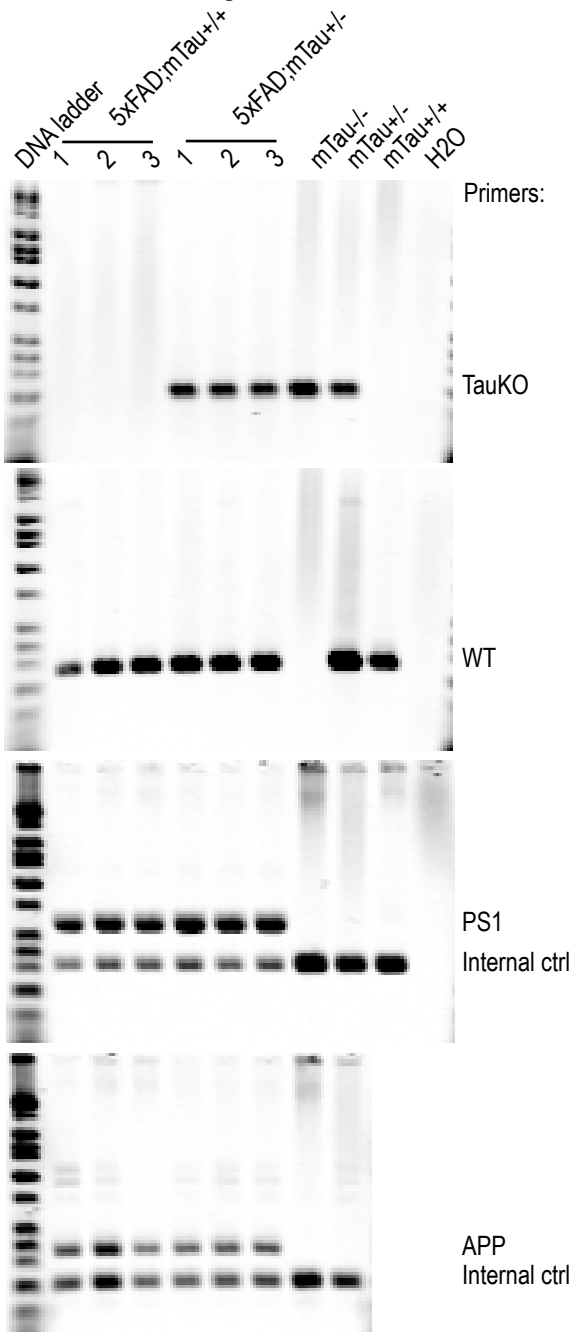

Fig. 3g

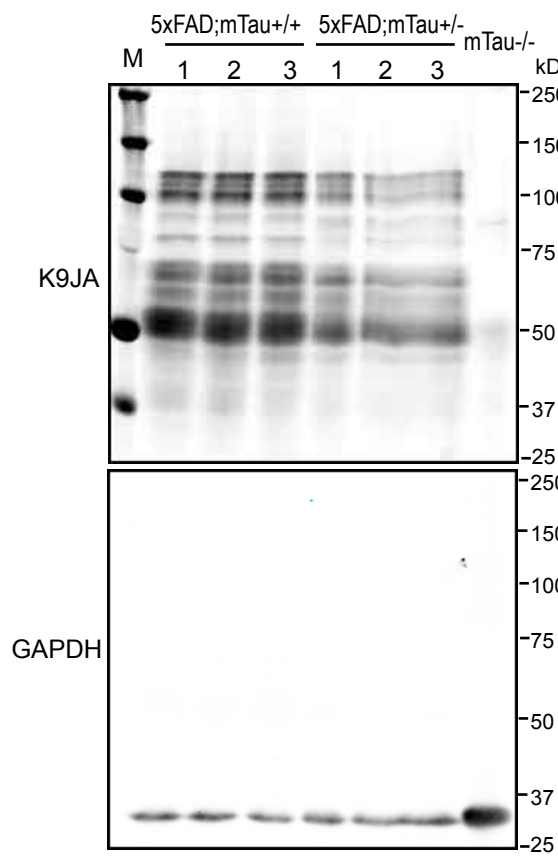

Supplementary Figure 11: Full length blots and gels for the cropped images shown in the paper.

**Supplementary Table 1. Demographics of human cases used in these studies**

| <b>Case No.</b> | <b>Neuropathological Diagnosis</b> | <b>Gender</b> | <b>Age at death</b> | <b>PMI (hr)</b> |
|-----------------|------------------------------------|---------------|---------------------|-----------------|
| 1               | AD                                 | F             | 68                  | 9               |
| 2               | AD                                 | F             | 59                  | 14              |
| 3               | AD                                 | M             | 66                  | 4               |
| 4               | AD                                 | F             | 87                  | 20              |
| 5               | AD                                 | F             | 73                  | 4               |
| 6               | AD                                 | F             | 82                  | 9               |
| 7               | AD                                 | F             | 70                  | 6               |
| 8               | AD                                 | M             | 84                  | 20              |
| 9               | AD                                 | F             | 67                  | 11              |
| 10              | AD                                 | F             | 64                  | 6               |
| 11              | AD                                 | M             | 94                  | 16              |
| 12              | AD                                 | F             | 88                  | 14              |
| 13              | AD                                 | M             | 86                  | 14              |
| 14              | AD                                 | M             | 77                  | 4.5             |
| 15              | AD                                 | F             | 89                  | 18              |
| 16              | AD                                 | F             | 101                 | 11.5            |
| 17              | AD                                 | F             | 75                  | 19              |
| 18              | AD                                 | M             | 64                  | 9               |
| 19              | AD                                 | F             | 64                  | 20              |
| 20              | AD                                 | F             | 93                  | 5               |
| 21              | AD                                 | M             | 91                  | 9               |
| 22              | AD                                 | M             | 88                  | 17              |
| 23              | AD                                 | F             | 61                  | 24              |
| 24              | AD                                 | M             | 71                  | 22              |
| 25              | AD                                 | M             | 54                  | 18              |
| 26              | AD                                 | F             | 85                  | 9               |
| 27              | AD                                 | F             | 86                  | 6               |
| 28              | AD                                 | F             | 72                  | 5               |
| 29              | AD                                 | M             | 85                  | 16              |
| 30              | AD                                 | M             | 77                  | 17              |
| 31              | AD                                 | F             | 65                  | 8.5             |
| 32              | AD                                 | F             | 80                  |                 |
| 33              | AD                                 | F             | 83                  | 20              |
| 34              | AD                                 | M             | 71                  | 4.5             |
| 35              | AD                                 | F             | 61                  | 8               |
| 36              | AD                                 | F             | 85                  | 8               |
| 37              | AD                                 | F             | 72                  | 12              |
| 38              | AD                                 | M             | 93                  | 5               |
| 39              | AD                                 | M             | 60                  | 12              |
| 40              | AD DS*                             | M             | 54                  | 14              |
| 41              | AD DS*                             | M             | 58                  | 13              |

|    |        |   |    |    |
|----|--------|---|----|----|
| 42 | DS     | F | 53 | 15 |
| 43 | DS     | F | 38 | 21 |
| 44 | DS     | M | 33 | 24 |
| 45 | DS     | F | 67 | 17 |
| 46 | PART   | M | 90 | 6  |
| 47 | PART   | M | 75 | 17 |
| 48 | PART   | F | 82 | 5  |
| 49 | PART   | M | 86 | 32 |
| 50 | PART   | M | 92 | 6  |
| 51 | PART   | F | 88 | 16 |
| 52 | PART   | M | 67 | 18 |
| 53 | Normal | M | 59 | 17 |
| 54 | Normal | F | 75 | 18 |

\*: Down Syndrome patients with postmortem neuropathological diagnosis of AD.

**Supplementary Table 2. Antibodies used in these studies**

| <b>Antibody Name</b> | <b>Specificity</b>                                      | <b>Host Species</b>    | <b>Dilutions</b>                               | <b>Source</b>                |
|----------------------|---------------------------------------------------------|------------------------|------------------------------------------------|------------------------------|
| R2295 mTau           | mouse tau                                               | rabbit polyclonal      | 1:1000 (WB, IF)                                | In-house                     |
| R2295 h&mTau         | human and mouse tau                                     | rabbit polyclonal      | 1:1000 (WB, IF)                                | In-house                     |
| AT8                  | p-tau (phosphorylated at Ser202 and Thr 205)            | mouse monoclonal, IgG1 | 1:1000 (WB); 1:10000 (IHC); 1:2000 (IF)        | Thermo Scientific            |
| PHF-1                | p-tau (phosphorylated at Ser396 and Ser404)             | mouse monoclonal, IgG1 | 1:1000 (WB)                                    | Gift from Dr. Peter Davies   |
| AT180                | p-tau (phosphorylated at Thr 231)                       | mouse monoclonal, IgG1 | 1:1000 (IHC)                                   | Thermo Scientific            |
| 12E8                 | p-tau (phosphorylated at pSer262/pSer356)               | mouse monoclonal, IgG1 | 1:5000 (IHC)                                   | In-house                     |
| pSer422              | p-tau (phosphorylated at pSer422)                       | mouse monoclonal       | 1:1000 (IHC)                                   | Gift from Dr. Michel Goedert |
| T46                  | tau (aa 401-441)                                        | mouse monoclonal, IgG1 | 1:1000 (WB)                                    | In-house                     |
| K9JA                 | tau (aa 243-441)                                        | rabbit polyclonal      | 1:5000 (WB); 1:200 (IF)                        | Dako                         |
| Anti-4R tau          | 4R tau                                                  | rabbit polyclonal      | 1:2000 (WB)                                    | Cosmo Bio USA                |
| MC1                  | tau in the pathological conformation                    | mouse monoclonal, IgG1 | 1:250 (WB); 1:5000 (IHC)                       | Gift from Dr. Peter Davies   |
| Alz50                | tau in the pathological conformation                    | mouse monoclonal, IgM  | 1:500 (IHC)                                    | Gift from Dr. Peter Davies   |
| TG3                  | Epitope around Thr231, in the pathological conformation | mouse monoclonal, IgM  | 1:100 with citrate buffer boil (IF)            | Gift from Dr. Peter Davies   |
| TOC1                 | Oligomeric tau                                          | mouse monoclonal, IgM  | 1:3000 with citrate buffer boil (IF)           | Gift from Dr. Lester Binder  |
| HT7                  | human tau (aa 159-163)                                  | mouse monoclonal, IgG1 | 1:500 (IF)                                     | Pierce                       |
| Biotinylated BT2     | tau (aa 194-198)                                        | mouse monoclonal       | 31.25 ng/ml as reporting antibody in tau ELISA | Pierce                       |



|                  |                                                        |                         |                                                                     |                       |
|------------------|--------------------------------------------------------|-------------------------|---------------------------------------------------------------------|-----------------------|
|                  |                                                        |                         | together with HT7                                                   |                       |
| Biotinylated HT7 | tau (aa 159-163)                                       | mouse monoclonal        | 62.5 ng/ml as reporting antibody in tau ELISA together with BT2     | Pierce                |
| 17028            | MAP2                                                   | rabbit polyclonal       | 1:2000 (IF)                                                         | In-house              |
| NFL              | Phospho-independent neurofilament light chain          | rabbit polyclonal       | 1:1000 (IF)                                                         | In-house              |
| TA51             | Phospho-dependent neurofilament heavy and middle chain | rat monoclonal          | 1:25 (IF)                                                           | In-house              |
| Synaptophysin    | Synaptophysin                                          | mouse monoclonal, IgG1  | 1:200 (IF)                                                          | Millipore             |
| VGLUT1           | Vesicular glutamate transporter 1                      | Guinea pig              | 1:1000 (IF)                                                         | Synaptic System       |
| VGAT             | Vesicular GABA Transporter                             | rabbit polyclonal       | 1:1000 (IF)                                                         | Synaptic System       |
| $\beta$ -actin   | actin                                                  | mouse monoclonal, IgM   | 1:200 (IF)                                                          | ProteinTech Group     |
| 22C11            | hAPP (aa 66-81)                                        | mouse monoclonal, IgG1  | 1:250 (IF)                                                          | Millipore             |
| Ubiquitin        | Ubiquitin                                              | rabbit polyclonal       | 1:500 (IF)                                                          | Dako                  |
| P62              | P62                                                    | mouse monoclonal, IgG2a | 1:500 (IF)                                                          | Abnova                |
| 2.2B10           | GFAP                                                   | rat monoclonal          | 1:1000 (IF)                                                         | In-house              |
| Iba1             | Iba1                                                   | rabbit polyclonal       | 1:1000 (IF)                                                         | Wako                  |
| NeuN             | NeuN                                                   | mouse monoclonal, IgG1  | 1:500 (IHC)                                                         | Millipore             |
| 9027             | $\alpha$ -syn (aa 130-140)                             | mouse monoclonal        | 3.3 $\mu$ g/ml as capture antibody for $\alpha$ -syn ELISA          | In-house              |
| MJF-R1           | $\alpha$ -syn (aa 118-123)                             | rabbit monoclonal       | 0.5425 $\mu$ g/ml as reporting antibody for $\alpha$ -syn ELISA     | Abcam                 |
| Ban50            | A $\beta$ (aa 1-10)                                    | mouse monoclonal        | 10 $\mu$ g/ml as capture antibody for A $\beta$ 1-40 and 1-42 ELISA | Takeda Pharmaceutical |
| NAB228           | A $\beta$ (aa 1-11)                                    | mouse monoclonal, IgG2a | 1:1000 (IHC); 1:1000 (IF)                                           | In-house              |
| BA27             | A $\beta$ 1-40                                         | mouse monoclonal, IgG2a | 1:10000 (IHC)                                                       | Takeda Pharmaceutical |

|                     |                |                     |                                                                                                           |                          |
|---------------------|----------------|---------------------|-----------------------------------------------------------------------------------------------------------|--------------------------|
| HRP-labeled<br>BA27 | A $\beta$ 1-40 | mouse<br>monoclonal | reporting antibody for<br>A $\beta$ 1-40 ELISA<br>(concentration not<br>determined after HRP<br>labeling) | Takeda<br>Pharmaceutical |
| HRP-labeled<br>BC05 | A $\beta$ 1-42 | mouse<br>monoclonal | reporting antibody for<br>A $\beta$ 1-42 ELISA<br>(concentration not<br>determined after HRP<br>labeling) | Takeda<br>Pharmaceutical |

Abbreviations: WB - western blotting; IHC -immunohistochemistry; IF – immunofluorescence.

**Supplementary Table 3: Detailed information for statistical analysis.**

| Fig. #  | Compare (group size n=)                                                       | Statistical method                                   | P value | t value | F value | Degrees of freedom |
|---------|-------------------------------------------------------------------------------|------------------------------------------------------|---------|---------|---------|--------------------|
| Fig. 1o | AT8+ NFT number in ipsilateral hippocampus of different AD-mice at 3 mo.p.i.. | One-way ANOVA, with Tukey's multiple comparison test | <0.0001 |         | 88.47   | 25                 |
|         | WT(15mo, n=5) vs APP KI(6mo, n=3)                                             |                                                      | >0.05   |         |         |                    |
|         | WT(15mo, n=5) vs APP KI(15mo, n=5)                                            |                                                      | >0.05   |         |         |                    |
|         | WT(15mo, n=5) vs 5xFAD(2mo, n=8)                                              |                                                      | <0.001  |         |         |                    |
|         | WT(15mo, n=5) vs 5xFAD(8mo, n=5)                                              |                                                      | <0.001  |         |         |                    |
|         | APP KI(6mo, n=3) vs APP KI(15mo, n=5)                                         |                                                      | >0.05   |         |         |                    |
|         | APP KI(6mo, n=3) vs 5xFAD(2mo, n=8)                                           |                                                      | <0.001  |         |         |                    |
|         | APP KI(6mo, n=3) vs 5xFAD(8mo, n=5)                                           |                                                      | <0.001  |         |         |                    |
|         | APP KI(15mo, n=5) vs 5xFAD(2mo, n=8)                                          |                                                      | <0.001  |         |         |                    |
|         | APP KI(15mo, n=5) vs 5xFAD(8mo, n=5)                                          |                                                      | <0.001  |         |         |                    |
|         | 5xFAD(2mo, n=8) vs 5xFAD(8mo, n=5)                                            |                                                      | <0.001  |         |         |                    |
| Fig. 1p | AT8+ NP number in ipsilateral hippocampus of different AD-mice at 3 mo.p.i..  | One-way ANOVA, with Tukey's multiple comparison test | <0.0001 |         | 336.9   | 25                 |
|         | WT(15mo, n=5) vs APP KI(6mo, n=3)                                             |                                                      | >0.05   |         |         |                    |
|         | WT(15mo, n=5) vs APP KI(15mo, n=5)                                            |                                                      | >0.05   |         |         |                    |
|         | WT(15mo, n=5) vs 5xFAD(2mo, n=8)                                              |                                                      | <0.001  |         |         |                    |
|         | WT(15mo, n=5) vs 5xFAD(8mo, n=5)                                              |                                                      | <0.001  |         |         |                    |
|         | APP KI(6mo, n=3) vs APP KI(15mo, n=5)                                         |                                                      | >0.05   |         |         |                    |
|         | APP KI(6mo, n=3) vs 5xFAD(2mo, n=8)                                           |                                                      | <0.001  |         |         |                    |
|         | APP KI(6mo, n=3) vs 5xFAD(8mo, n=5)                                           |                                                      | <0.001  |         |         |                    |

|         |                                                                                     |                                                      |         |       |       |    |
|---------|-------------------------------------------------------------------------------------|------------------------------------------------------|---------|-------|-------|----|
|         | APP KI(15mo, n=5) vs 5xFAD(2mo, n=8)                                                |                                                      | <0.001  |       |       |    |
|         | APP KI(15mo, n=5) vs 5xFAD(8mo, n=5)                                                |                                                      | <0.001  |       |       |    |
|         | 5xFAD(2mo, n=8) vs 5xFAD(8mo, n=5)                                                  |                                                      | <0.001  |       |       |    |
| Fig. 1q | AT8+ NP number vs A $\beta$ burden                                                  | Spearman Rank-Order Correlation Coefficient          | <0.001  | 12.83 |       | 24 |
| Fig. 1r | AT8+ NFT number in ipsilateral Entorhinal cortex of different AD-mice at 3 mo.p.i.. | One-way ANOVA, with Tukey's multiple comparison test | <0.0001 |       | 37.45 | 25 |
|         | WT(15mo, n=5) vs APP KI(6mo, n=3)                                                   |                                                      | >0.05   |       |       |    |
|         | WT(15mo, n=5) vs APP KI(15mo, n=5)                                                  |                                                      | <0.001  |       |       |    |
|         | WT(15mo, n=5) vs 5xFAD(2mo, n=8)                                                    |                                                      | <0.001  |       |       |    |
|         | WT(15mo, n=5) vs 5xFAD(8mo, n=5)                                                    |                                                      | <0.001  |       |       |    |
|         | APP KI(6mo, n=3) vs APP KI(15mo, n=5)                                               |                                                      | <0.001  |       |       |    |
|         | APP KI(6mo, n=3) vs 5xFAD(2mo, n=8)                                                 |                                                      | <0.001  |       |       |    |
|         | APP KI(6mo, n=3) vs 5xFAD(8mo, n=5)                                                 |                                                      | <0.001  |       |       |    |
|         | APP KI(15mo, n=5) vs 5xFAD(2mo, n=8)                                                |                                                      | >0.05   |       |       |    |
|         | APP KI(15mo, n=5) vs 5xFAD(8mo, n=5)                                                |                                                      | >0.05   |       |       |    |
|         | 5xFAD(2mo, n=8) vs 5xFAD(8mo, n=5)                                                  |                                                      | >0.05   |       |       |    |
| Fig. 1s | AT8+ NP number in Hpx vs AT8+ NFT number in Ent                                     | Spearman Rank-Order Correlation Coefficient          | <0.001  | -9.68 |       | 24 |
| Fig. 2d | R2295 O.D. in insoluble fraction from AD-WT (n=3) v.s. AD-5xFAD (n=3) at 1mo.p.i.   | 2-sided, unpaired t-test                             | 0.034   |       | 3.166 | 4  |
| Fig. 2e | PHF-1 O.D. in insoluble fraction from AD-WT (n=3) v.s. AD-5xFAD (n=3) at 1mo.p.i.   | 2-sided, unpaired t-test                             | 0.0676  |       | 2.488 | 4  |
| Fig. 2f | R2295 O.D. in insoluble fraction from AD-WT (n=5) v.s. AD-5xFAD (n=4) at 3mo.p.i.   | 2-sided, unpaired t-test                             | 0.0099  |       | 3.505 | 7  |
| Fig. 2g | PHF-1 O.D. in insoluble fraction from AD-WT (n=5) v.s. AD-5xFAD (n=4) at 3mo.p.i.   | 2-sided, unpaired t-test                             | 0.0078  |       | 3.687 | 7  |

|         |                                                                                                                                |                                                      |         |       |       |     |
|---------|--------------------------------------------------------------------------------------------------------------------------------|------------------------------------------------------|---------|-------|-------|-----|
| Fig. 3b | Compact plaque fraction in Ctrl- (n=3) v.s. AD-5xFAD (n=3)                                                                     | 2-sided, unpaired t-test, Welch-corrected            | 0.1669  | 2.13  |       | 2   |
| Fig. 3c | Non-compact v.s. compact A $\beta$ plaques with K9JA+ accumulated tau (n=3)                                                    | 2-sided, paired t-test                               | 0.0449  | 4.559 |       | 2   |
| Fig. 3e | Non-compact v.s. compact A $\beta$ plaques with AT8+ NP tau (n=3)                                                              | 2-sided, paired t-test                               | 0.0341  | 5.273 |       | 2   |
| Fig. 3i | NAB228 area% in 5xFAD;mTau+/+ (n=3) v.s. AD-5xFAD;mTau+/- (n=3)                                                                | 2-sided, unpaired t-test, Welch-corrected            | 0.2503  | 1.602 |       | 2   |
| Fig. 3k | Hippocampal NP number in AD-5xFAD;mTau+/+ (n=3) v.s. AD-5xFAD;mTau+/- (n=3)                                                    | 2-sided, unpaired t-test, Welch-corrected            | 0.0165  | 4.875 |       | 3   |
|         | Cortical NP number in AD-5xFAD;mTau+/+ v.s. AD-5xFAD;mTau+/-                                                                   | 2-sided, unpaired t-test, Welch-corrected            | 0.0158  | 4.951 |       | 3   |
| Fig. 3l | AT8+ area% in each NP in AD-5xFAD;mTau+/+ (n=235) v.s. AD-5xFAD;mTau+/- (n=121)                                                | 2-sided, unpaired t-test                             | <0.0001 | 12.47 |       | 354 |
| Fig. 4c | NT in AD-5xFAD at 3mo.p.i. F(n=3) v.s. 9mo.p.i. (n=8) in Hip. DG                                                               | 2-sided, unpaired t-test, Welch-corrected            | 0.0021  | 4.760 |       | 7   |
| Fig. 4d | AT8+ NFTs in the Ent regions of 3mo.p.i. AD-5xFAD(n=3), 9mo.p.i. AD-5xFAD(n=8), 6mo.p.i. AD-WT(n=4) and 9mo.p.i. AD-5xFAD(n=8) | One-way ANOVA, with Tukey's multiple comparison test | <0.0001 |       | 21.96 | 22  |
|         | AT8+ NFTs in the Hpx regions of 3mo.p.i. AD-5xFAD(n=3), 9mo.p.i. AD-5xFAD(n=8), 6mo.p.i. AD-WT(n=4) and 9mo.p.i. AD-5xFAD(n=8) | One-way ANOVA, with Tukey's multiple comparison test | 0.0016  |       | 7.570 | 22  |
| Fig. 4e | MC1+ NFT in AD-WT(n=8) v.s. AD-5xFAD(n=8) in Ent                                                                               | 2-sided, unpaired t-test, Welch-corrected            | 0.0032  | 3.667 |       | 12  |
|         | MC1+ NFT in AD-WT(n=8) v.s. AD-5xFAD(n=8) in Hpx                                                                               | 2-sided, unpaired t-test, Welch-corrected            | 0.0546  | 2.112 |       | 13  |
| Fig. 4f | ThioS+ NFT in AD-WT(n=8) v.s. AD-5xFAD(n=8) in Ent                                                                             | 2-sided, unpaired t-test, Welch-corrected            | 0.0008  | 4.343 |       | 13  |
|         | ThioS+ NFT in AD-WT(n=8) v.s. AD-5xFAD(n=8) in Hpx                                                                             | 2-sided, unpaired t-test, Welch-corrected            | <0.0001 | 6.252 |       | 12  |

|         |                                                                |                                           |                                            |        |                                            |                             |
|---------|----------------------------------------------------------------|-------------------------------------------|--------------------------------------------|--------|--------------------------------------------|-----------------------------|
| Fig. 5b | Early AD_Sup. Temp. (n=16) NPs v.s. NFTs                       | 2-sided, paired t-test                    | 0.1359                                     | 1.576  |                                            | 15                          |
| Fig. 5c | Early AD_Visual (n=16) NPs v.s. NFTs                           | 2-sided, paired t-test                    | 0.0306                                     | 2.516  |                                            | 10                          |
| Fig. 5d | Late AD_Sup. Temp. (n=16) NPs v.s. NFTs                        | 2-sided, paired t-test                    | 0.2064                                     | 1.321  |                                            | 15                          |
| Fig. 5e | Late AD_Visual (n=17) NPs v.s. NFTs                            | 2-sided, paired t-test                    | <0.0001                                    | 6.286  |                                            | 16                          |
| Fig. 6b | Total activity Ctrl (n=13) v.s. AD-WT (n=10)                   | 2-sided, unpaired t-test, Welch-corrected | 0.6636                                     | 0.4418 |                                            | 19                          |
|         | Total activity Ctrl (n=8) v.s. AD-5xFAD (n=10)                 | 2-sided, unpaired t-test, Welch-corrected | 0.4925                                     | 0.7063 |                                            | 13                          |
| Fig. 6c | Open area Ctrl (n=13) v.s. AD-WT (n=10)                        | 2-sided, unpaired t-test, Welch-corrected | 0.0178                                     | 2.582  |                                            | 20                          |
|         | Total distance Ctrl (n=13) v.s. AD-WT (n=10)                   | 2-sided, unpaired t-test, Welch-corrected | 0.0939                                     | 1.763  |                                            | 19                          |
|         | Open area Ctrl (n=7) v.s. AD-5xFAD (n=10)                      | 2-sided, unpaired t-test, Welch-corrected | 0.5845                                     | 0.5634 |                                            | 11                          |
|         | Total distance Ctrl (n=7) v.s. AD-5xFAD (n=10)                 | 2-sided, unpaired t-test, Welch-corrected | 0.2987                                     | 1.079  |                                            | 10                          |
| Fig. 6d | Y-maze spontaneous alternation Ctrl (n=12) v.s. AD-WT (n=10)   | 2-sided, unpaired t-test, Welch-corrected | 0.4484                                     | 0.7741 |                                            | 19                          |
|         | Y-maze spontaneous alternation Ctrl (n=8) v.s. AD-5xFAD (n=10) | 2-sided, unpaired t-test, Welch-corrected | 0.5489                                     | 0.6133 |                                            | 15                          |
| Fig. 6e | Before stimulation Ctrl (n=13) v.s. AD-WT (n=10)               | 2-sided, unpaired t-test, Welch-corrected | 0.0226                                     | 2.586  |                                            | 13                          |
|         | After stimulation Ctrl (n=13) v.s. AD-WT (n=10)                | Two-way ANOVA with repeated measurements  | Interaction=0.2131; Time=0.7050; AD=0.8133 |        | Interaction=1.649; Time=0.1473; AD=0.05718 | Interaction=1; Time=1; AD=1 |
|         | Before stimulation Ctrl (n=8) v.s. AD-5xFAD (n=10)             | 2-sided, unpaired t-test, Welch-corrected | 0.7666                                     | 0.3051 |                                            | 10                          |

|            |                                                                                 |                                                      |                                              |        |                                             |                               |
|------------|---------------------------------------------------------------------------------|------------------------------------------------------|----------------------------------------------|--------|---------------------------------------------|-------------------------------|
|            | After stimulation Ctrl (n=8) v.s. AD-5xFAD (n=10)                               | Two-way ANOVA with repeated measurements             | Interaction=0.0612; Time=0.0466; AD=0.6176   |        | Interaction=4.054; Time=4.649; AD=0.2592    | Interaction=1; Time=1; AD=1   |
|            | After stimulation Ctrl 5xFAD (n=8) 1d v.s. 14d                                  | 2-sided, paired t-test                               | 0.8674                                       | 0.1731 |                                             | 8                             |
|            | After stimulation AD-5xFAD (n=10) 1d v.s. 14d                                   | 2-sided, paired t-test                               | 0.0328                                       | 2.52   |                                             | 9                             |
| Fig. 6h    | WT (n=6) v.s. AD-WT (n=6)                                                       | Two-way ANOVA with repeated measurements             | Interaction=0.9635; Region<0.0001; AD=0.0045 |        | Interaction=0.0373; Region=29.93; AD=11.17  | Interaction=2; Region=2; AD=1 |
|            | WT (n=6) v.s. AD-WT (n=6) in DG                                                 | 2-sided, unpaired t-test, Welch-corrected            | 0.2196                                       | 1.32   |                                             | 9                             |
|            | WT (n=6) v.s. AD-WT (n=6) in Hilus                                              | 2-sided, unpaired t-test, Welch-corrected            | 0.0942                                       | 1.899  |                                             | 8                             |
|            | WT (n=6) v.s. AD-WT (n=6) in CA3                                                | 2-sided, unpaired t-test, Welch-corrected            | 0.0327                                       | 2.579  |                                             | 8                             |
|            | 5xFAD (n=3) v.s. AD-5xFAD (n=3)                                                 | Two-way ANOVA with repeated measurements             | Interaction=0.9555; Region=0.0134; AD=0.3621 |        | Interaction=0.0459; Region=9.644; AD=0.9727 | Interaction=2; Region=2; AD=1 |
| S. Fig. 1d | AT180+ NFT number in ipsilateral hippocampus of different AD-mice at 3 mo.p.i.. | One-way ANOVA, with Tukey's multiple comparison test | <0.0001                                      |        | 28.48                                       | 25                            |

|            |                                                                                |                                                      |         |  |       |    |
|------------|--------------------------------------------------------------------------------|------------------------------------------------------|---------|--|-------|----|
|            | WT(15mo, n=5) vs APP KI(6mo, n=3)                                              |                                                      | >0.05   |  |       |    |
|            | WT(15mo, n=5) vs APP KI(15mo, n=5)                                             |                                                      | >0.05   |  |       |    |
|            | WT(15mo, n=5) vs 5xFAD(2mo, n=8)                                               |                                                      | <0.001  |  |       |    |
|            | WT(15mo, n=5) vs 5xFAD(8mo, n=5)                                               |                                                      | <0.001  |  |       |    |
|            | APP KI(6mo, n=3) vs APP KI(15mo, n=5)                                          |                                                      | >0.05   |  |       |    |
|            | APP KI(6mo, n=3) vs 5xFAD(2mo, n=8)                                            |                                                      | <0.001  |  |       |    |
|            | APP KI(6mo, n=3) vs 5xFAD(8mo, n=5)                                            |                                                      | <0.001  |  |       |    |
|            | APP KI(15mo, n=5) vs 5xFAD(2mo, n=8)                                           |                                                      | <0.001  |  |       |    |
|            | APP KI(15mo, n=5) vs 5xFAD(8mo, n=5)                                           |                                                      | <0.001  |  |       |    |
|            | 5xFAD(2mo, n=8) vs 5xFAD(8mo, n=5)                                             |                                                      | >0.05   |  |       |    |
| S. Fig. 1e | AT180+ NP number in ipsilateral hippocampus of different AD-mice at 3 mo.p.i.. | One-way ANOVA, with Tukey's multiple comparison test | <0.0001 |  | 46.12 | 25 |
|            | WT(15mo, n=5) vs APP KI(6mo, n=3)                                              |                                                      | >0.05   |  |       |    |
|            | WT(15mo, n=5) vs APP KI(15mo, n=5)                                             |                                                      | >0.05   |  |       |    |
|            | WT(15mo, n=5) vs 5xFAD(2mo, n=8)                                               |                                                      | <0.001  |  |       |    |
|            | WT(15mo, n=5) vs 5xFAD(8mo, n=5)                                               |                                                      | <0.001  |  |       |    |
|            | APP KI(6mo, n=3) vs APP KI(15mo, n=5)                                          |                                                      | >0.05   |  |       |    |
|            | APP KI(6mo, n=3) vs 5xFAD(2mo, n=8)                                            |                                                      | <0.01   |  |       |    |
|            | APP KI(6mo, n=3) vs 5xFAD(8mo, n=5)                                            |                                                      | <0.001  |  |       |    |
|            | APP KI(15mo, n=5) vs 5xFAD(2mo, n=8)                                           |                                                      | >0.05   |  |       |    |
|            | APP KI(15mo, n=5) vs 5xFAD(8mo, n=5)                                           |                                                      | <0.001  |  |       |    |



|               |                                                                                             |                                                            |         |       |       |    |
|---------------|---------------------------------------------------------------------------------------------|------------------------------------------------------------|---------|-------|-------|----|
|               | 5xFAD(2mo, n=8) vs<br>5xFAD(8mo, n=5)                                                       |                                                            | <0.001  |       |       |    |
| S. Fig.<br>1f | AT180+ NFT number in<br>ipsilateral Entorhinal cortex of<br>different AD-mice at 3 mo.p.i.. | One-way ANOVA,<br>with Tukey's multiple<br>comparison test | 0.0013  |       | 6.649 | 25 |
|               | WT(15mo, n=5) vs APP<br>KI(6mo, n=3)                                                        |                                                            | >0.05   |       |       |    |
|               | WT(15mo, n=5) vs APP<br>KI(15mo, n=5)                                                       |                                                            | >0.05   |       |       |    |
|               | WT(15mo, n=5) vs 5xFAD(2mo,<br>n=8)                                                         |                                                            | <0.05   |       |       |    |
|               | WT(15mo, n=5) vs 5xFAD(8mo,<br>n=5)                                                         |                                                            | <0.01   |       |       |    |
|               | APP KI(6mo, n=3) vs APP<br>KI(15mo, n=5)                                                    |                                                            | >0.05   |       |       |    |
|               | APP KI(6mo, n=3) vs<br>5xFAD(2mo, n=8)                                                      |                                                            | >0.05   |       |       |    |
|               | APP KI(6mo, n=3) vs<br>5xFAD(8mo, n=5)                                                      |                                                            | <0.05   |       |       |    |
|               | APP KI(15mo, n=5) vs<br>5xFAD(2mo, n=8)                                                     |                                                            | >0.05   |       |       |    |
|               | APP KI(15mo, n=5) vs<br>5xFAD(8mo, n=5)                                                     |                                                            | >0.05   |       |       |    |
|               | 5xFAD(2mo, n=8) vs<br>5xFAD(8mo, n=5)                                                       |                                                            | >0.05   |       |       |    |
| S. Fig.<br>1g | AT180+ NP number in Hpx vs<br>AT180+ NFT number in Ent                                      | Spearman Rank-<br>Order Correlation<br>Coefficient         | <0.001  | -6.67 |       | 24 |
| S. Fig.<br>5b | NFT number in ipsilateral<br>hippocampus of different AD-<br>mice.                          | One-way ANOVA,<br>with Tukey's multiple<br>comparison test | <0.0001 |       | 205.4 | 32 |
| S. Fig.<br>5c | NP number in ipsilateral<br>hippocampus of different AD-<br>mice.                           | One-way ANOVA,<br>with Tukey's multiple<br>comparison test | <0.0001 |       | 366.8 | 32 |
| S. Fig.<br>5d | NFT number in ipsilateral<br>Entorhinal cortex of different<br>AD-mice.                     | One-way ANOVA,<br>with Tukey's multiple<br>comparison test | <0.0001 |       | 23.10 | 32 |
| S. Fig.<br>5e | NP number in ipsilateral<br>Entorhinal cortex of different<br>AD-mice.                      | One-way ANOVA,<br>with Tukey's multiple<br>comparison test | <0.0001 |       | 13.24 | 32 |
| S. Fig.<br>7c | NFTs in Ent of the mice injected<br>with AD1-tau 2µg dose (n=3)<br>v.s. 8µg dose (n=3)      | 2-sided, unpaired t-<br>test, Welch-corrected              | 0.0029  | 9.016 |       | 3  |

|            |                                                                                                   |                                           |        |        |  |    |
|------------|---------------------------------------------------------------------------------------------------|-------------------------------------------|--------|--------|--|----|
|            | NFTs in Hpx of the mice injected with AD1-tau 2 $\mu$ g dose (n=3) v.s. 8 $\mu$ g dose (n=3)      | 2-sided, unpaired t-test, Welch-corrected | 0.0561 | 4.043  |  | 2  |
| S. Fig. 7d | NPs in Ent of the mice injected with AD1-tau 2 $\mu$ g dose (n=3) v.s. 8 $\mu$ g dose (n=3)       | 2-sided, unpaired t-test, Welch-corrected | 0.7939 | 0.2854 |  | 3  |
|            | NPs in Hpx of the mice injected with AD1-tau 2 $\mu$ g dose (n=3) v.s. 8 $\mu$ g dose (n=3)       | 2-sided, unpaired t-test, Welch-corrected | 0.5332 | 0.7466 |  | 2  |
| S. Fig. 7g | NFTs in Ent of the mice injected with AD2-tau 0.82 $\mu$ g dose (n=3) v.s. 8.2 $\mu$ g dose (n=3) | 2-sided, unpaired t-test, Welch-corrected | 0.0083 | 6.247  |  | 3  |
|            | NFTs in Hpx of the mice injected with AD2-tau 0.82 $\mu$ g dose (n=3) v.s. 8.2 $\mu$ g dose (n=3) | 2-sided, unpaired t-test, Welch-corrected | 0.0253 | 6.161  |  | 2  |
| S. Fig. 7h | NPs in Ent of the mice injected with AD2-tau 0.82 $\mu$ g dose (n=3) v.s. 8.2 $\mu$ g dose (n=3)  | 2-sided, unpaired t-test, Welch-corrected | 0.0920 | 3.065  |  | 2  |
|            | NPs in Hpx of the mice injected with AD2-tau 0.82 $\mu$ g dose (n=3) v.s. 8.2 $\mu$ g dose (n=3)  | 2-sided, unpaired t-test, Welch-corrected | 0.0090 | 6.072  |  | 3  |
| S. Fig. 9a | Total activity Ctrl (n=7) v.s. AD-5xFAD(5mo) (n=7) at 1mo.p.i.                                    | 2-sided, unpaired t-test, Welch-corrected | 0.8032 | 0.2552 |  | 11 |
|            | Total activity Ctrl (n=13) v.s. AD-5xFAD(2mo) (n=13) at 3mo.p.i.                                  | 2-sided, unpaired t-test, Welch-corrected | 0.0892 | 1.778  |  | 22 |
| S. Fig. 9b | Y-maze spontaneous alternation Ctrl (n=7) v.s. AD-5xFAD(5mo) (n=7) at 1mo.p.i.                    | 2-sided, unpaired t-test, Welch-corrected | 0.1379 | 1.6    |  | 11 |
|            | Y-maze spontaneous alternation Ctrl (n=13) v.s. AD-5xFAD(2mo) (n=13) at 3mo.p.i.                  | 2-sided, unpaired t-test, Welch-corrected | 0.943  | 0.0728 |  | 23 |
| S. Fig. 9c | Open area Ctrl (n=7) v.s. AD-5xFAD(5mo) (n=6) at 1mo.p.i.                                         | 2-sided, unpaired t-test, Welch-corrected | 0.4031 | 0.8773 |  | 9  |
|            | Total distance Ctrl (n=7) v.s. AD-5xFAD(5mo) (n=6) at 1mo.p.i.                                    | 2-sided, unpaired t-test, Welch-corrected | 0.3825 | 0.9182 |  | 9  |
|            | Open area Ctrl (n=11) v.s. AD-5xFAD(2mo) (n=12) at 3mo.p.i.                                       | 2-sided, unpaired t-test, Welch-corrected | 0.029  | 2.352  |  | 20 |
|            | Total distance Ctrl (n=11) v.s. AD-5xFAD(2mo) (n=12) at 3mo.p.i.                                  | 2-sided, unpaired t-test, Welch-corrected | 0.6071 | 0.5225 |  | 20 |

|            |                                                                      |                                           |                                            |        |                                           |                             |
|------------|----------------------------------------------------------------------|-------------------------------------------|--------------------------------------------|--------|-------------------------------------------|-----------------------------|
| S. Fig. 9d | Before stimulation Ctrl (n=13) v.s. AD-5xFAD(2mo) (n=12) at 3mo.p.i. | 2-sided, unpaired t-test, Welch-corrected | 0.3593                                     | 0.9364 |                                           | 22                          |
|            | After stimulation Ctrl (n=13) v.s. AD-5xFAD(2mo) (n=12) at 3mo.p.i.  | Two-way ANOVA with repeated measurement   | Interaction=0.4820; Time=0.2782; AD=0.7176 |        | Interaction=0.5107; Time=1.234; AD=0.1341 | Interaction=1; Time=1; AD=1 |
|            | Before stimulation Ctrl (n=7) v.s. AD-5xFAD(5mo) (n=7) at 1mo.p.i.   | 2-sided, unpaired t-test, Welch-corrected | 0.4905                                     |        | 0.7134                                    | 11                          |
|            | After stimulation Ctrl (n=7) v.s. AD-5xFAD(5mo) (n=7) at 1mo.p.i.    | Two-way ANOVA with repeated measurement   | Interaction=0.1880; Time=0.0045; AD=0.4414 |        | Interaction=1.919; Time=12.11; AD=0.6338  | Interaction=1; Time=1; AD=1 |
|            | After stimulation Ctrl 5xFAD(2mo) (n=7) 1d v.s. 14d                  | 2-sided, paired t-test                    | 0.126                                      | 1.777  |                                           | 6                           |
|            | After stimulation AD-5xFAD(5mo) (n=7) 1d v.s. 14d                    | 2-sided, paired t-test                    | 0.0237                                     | 3.011  |                                           | 6                           |
